# Supplementary material for: A simple and sequential strategy for the introduction of complexity and hierarchy in hydrogen-bonded organic (HOFs) crystals for environmental applications
Source: Research Square preprint supplement (doi:10.21203/rs.3.rs-3791900/v1), 2024-01-09
Supplement: Supplementary file 1 [file eec7cdba62b08a27e7783290.docx]

#

# **Supporting Information**

**For**

**A simple and sequential strategy for the introduction of complexity and hierarchy in hydrogen-bonded organic (HOFs) crystals for environmental applications**

Christopher A. Halliwell, Kenny Jolley, Keith Yendall, Mark R. J. Elsegood, Gary N. Parkinson*,Antonio Fernandez*

## **General Materials and Analysis**

Reactants, solvents, and other reagents were all commercially purchased from various suppliers and in all cases, were obtained in 95-100% purity. The molecular precursor, **3COOH**, was purchased from Sigma Aldrich. All chemicals were used directly without further purification, unless stated otherwise. The molecular precursor, **TPY**, was synthesized according to a published procedures [1]. Analytical thin-layer chromatography was used in most syntheses and were performed on 40 mm x 80 mm precoated Machery-Nagel ALUGRAM SIL G/UV254 aluminium sheets (Fischer Scientific) and visualised with ultraviolet light (264 nm). Column chromatography was performed using silica gel 60, 40-63 µm mesh (Apollo Scientific). Fourier transform-infrared (FT-IR) studies were recorded by using a Bruker TENSOR-27 spectrophotometer at room temperature. Thermogravimetric analysis was conducted using a Mettler-Toledo model TGA/SDTA851 at a heating rate of 10 °C min−1 under N2. Single-crystal X-ray crystallography data was obtained from the ESPRC National Crystallographic Service at the University of Southampton and collected on a Rigaku 007FH diffractometer equipped with an AFC11 goniometer and HyPix 6000 detector at 100(2) K using Cu- K (λ = 1.54178 Å) radiation from a rotating anode source. The structure for **P2-TPY** was solved by dual-space iterative methods and refined on *F*2 by full-matrix least squares methods using the SHELXL-2018 software package. H atoms were constrained in a riding model. Refined as a 2-component twin with twin law 0.087 0 –0.913, 0 –1 0, –1.087 0 –0.087 and twin component ratio of 0.0407:0.9593(19). The solvate molecules were treated as diffuse contribution to the overall scattering without specific atom positions by SQUEEZE/PLATON due to severe disorder of these solvate molecules in the lattice. The structure of **P2-TPY** was close to hexagonal symmetry but is actually monoclinic, and had major and minor merhoedral twin components 1.86:98.84(10)% for twin law 0 0 1 0 -1 0 1 0 0. Due to the resulting poor data quality, restraints were applied to anisotropic displacement parameters and some geometry. The data collection, cell refinement, data reduction for for **Hybrid-1** and 2306105 for **HOF-3COOH** were undertaken using CrysAlisPro 1.171.42.60a [2]. The structures were solved by dual-space iterative methods on F2 and refined on F2 using the olex2.refine software package within Olex2-1.5 [3]. H atoms were constrained in a riding model. Further details are provided in table S1,S2 and S3 and in the deposited cif files CCDC 2304619 for **Hybrid-1** and 2306105 for **HOF-3COOH** that contains the supplementary crystallographic data for this paper. These data can be obtained free of charge from The Cambridge Crystallographic Data Centre via [www.ccdc.cam.ac.uk/structures](http://www.ccdc.cam.ac.uk/structures)*.* PXRD patterns were obtained using a Bruker D2 Phaser X-ray diffractometer, fitted with a 1-dimensional Lynxeye detector and a copper X-ray source (Kα = 1.54184 Å) operated at 30 kV and 10 mA. Kβ radiation was suppressed by means of a 0.5 mm thick nickel filter. Patterns were recorded over a range of 4 – 30° (2*θ*) with a step size of 0.041° and an equivalent step time of 96 seconds per step. Sample rotation was set at 15 rpm. Scanning electron microscopy was carried out on a JEOL JSM-7100F Field Emission Scanning Electron Microscope (FE-SEM). Samples were sputter coated with gold/palladium to provide a 5–10 nm conductive layer to facilitate analysis. Images were collected using an accelerating voltage of 5 kV and an approximate beam current of 120 pA. UV-vis analysis was performed in a Shimadzu UV-1800 UV-Vis Spectrophotometer. CO2 gas adsorption analysis was performed in a Micromeritics ASAP 2020. All the samples were out-gases at either 80°C or 110°C for 16 hours prior the gas adsorption experiment.

**1-General crystallisation conditions**

-**P2-TPY**: TPY (10 mg) in toluene (15 mL) was added into a glass vial. The mixture was heated at 110oC for 10 minutes until complete dissolution. After all the toluene was evaporated at temperature below 18oC for 4 days, hollow crystals of P2-TPY were collected.

-**FA-TPY**: TPY (19 mg) in toluene (15 mL) were added into a glass vial. The mixture was heated at 110oC for 10 minutes until complete dissolution. After all the toluene was evaporated in 3 days at room temperature, FA-TPY was collected.

-**DFA-TPY**: FA-TPY crystals in an open vial were submerged in a solution (12 mg in 15 mL of toluene) of TPY in toluene and left to evaporate fast at 50oC (~20 hours), allowing new crystals to grow on FA-TPY.

-**P2-TPY@P2-TPY:** P2-TPY crystals in an open vial were submerged in a solution of TPY (10 mg in 15 mL of toluene) and left to evaporate at room temperature for 20 minutes, allowing new crystals to grow on P2-TPY. The process was repeated 4 times.

-**Hybrid-1**: 10 mg of TPY in toluene (35 mL) were added into a glass vial and mixed with 29 mg of 3COOH in ethanol (50 mL). The mixture was left to evaporated slowly at room temperature, and hollow crystals of Hybrid-1 were collected after 15 days.

-**P2-TPY@Hybrid-1**: Activated P2-TPY crystals were submerged in a solution of 3COOH (1.3mg/mL) in ethanol and left to evaporate at room temperature for 4 days, allowing new crystals of Hybrid-1 to grow on P2-TPY.

-**HOF-3COOH**: 3COOH (20 mg) in methanol (15 mL) was added into a glass vial. The mixture was heated at 70oC for 10 minutes until complete dissolution. The solution was left undisturbed for 2 weeks until crystals of HOF-3COOH appeared and were collected by filtration.

-**HOF-3COOH@P2-TPY**: HOF-3COOH crystals were located in a small vial, covering all the bottom of the vial, and a solution of TPY (10 mg in 15 mL of toluene) was added to the vial, enough to cover 1/3 of the vial, and left to evaporate at 58oC for at least 18 hours, allowing crystals of P2-TPY to grow on HOF-3COOH and being collected thereafter.

**2-Study for the oil-water adsorption of dyes and microplastic trapping with** **DFA-TPY crystals:**

**-Dye mixture:** crystals of **DFA-TPY** were dipped in an emulsion of petroleum ether and water containing Oil Red (OR). After 2 minutes, all the OR was readily adsorbed.

**-Microplastic removal:** 10 mg of PET of different sizes and diameters, ranging between 10-500 microns were added to 100 mL deionized water. **DFA-TPY** crystals were usedalong a vacuum filtration system, as described in Figure 6 in the article. The amount of microplastics was determined by TGA analysis.

a) b)


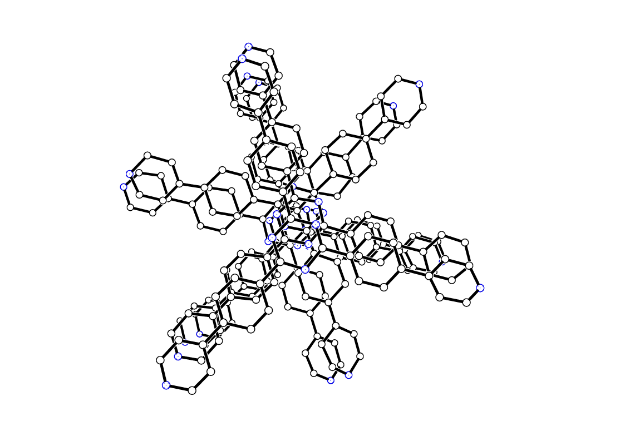

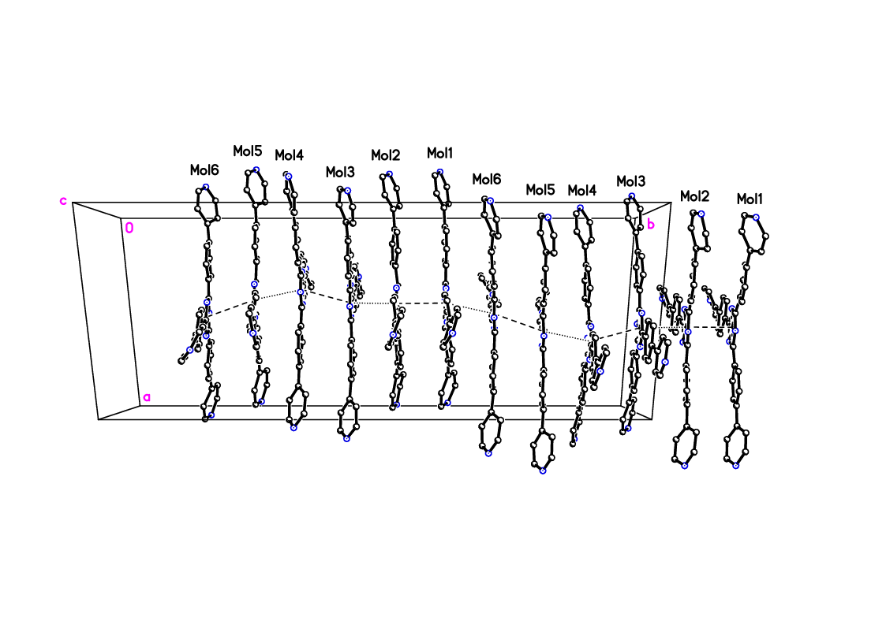


**Figure S1.** Overview of the crystal packing of **P2-TPY** (with toluene molecules omitted): a) detailed visualization of the pyridyl molecules arranged in pairs and all six unique molecules form an infinite π∙∙∙π stacked column parallel to *b* and b) visualization view onto ac plane. Atom colours: black=carbon, blue=nitrogen.

**Table S1.** Crystallographic data and structure refinement results of **P2-TPY** toluene solvate.

*1-Crystal data*

| C36H24N6·1.5(C7H8) | *F*(000) = 4284 |
| --- | --- |
| *Mr* = 678.81 | *D*x = 1.275 Mg m-3 |
| Monoclinic, *P*21 | Cu *K*a radiation, l = 1.54184 Å |
| *a* = 17.4693(5) Å | Cell parameters from 10634 reflections |
| *b* = 40.0964(7) Å | q = 3.1–73.8° |
| *c* = 17.4825(5) Å | m = 0.59 mm-1 |
| b = 119.942(4)° | *T* = 100 K |
| *V* = 10611.3(6) Å3 | Cylinder, colourless |
| *Z’ = 2, Z* = 12 | 0.15 × 0.07 × 0.01 mm3 |

*Data collection*

| Rigaku 007HF diffractometer with HF Varimax confocal mirrors, an UG2 goniometer and HyPix 6000HE detector | 30090 independent reflections |
| --- | --- |
| Radiation source: Rotating anode | 29201 reflections with *I* > 2s(*I*) |
| Detector resolution: 10 pixels mm-1 | *R*int = 0.032 |
| profile data from w–scans | qmax = 68.3°, qmin = 2.9° |
| Absorption correction: multi-scan. *CrysAlis PRO* 1.171.41.123a (Rigaku Oxford Diffraction, 2022). Empirical absorption correction using spherical harmonics, implemented in SCALE3 ABSPACK scaling algorithm. | *h* = -17®20 |
| *T*min = 0.692, *T*max = 1.000 | *k* = -48®48 |
| 53982 measured reflections | *l* = -21®20 |

*Refinement*

| Refinement on *F*2 | Hydrogen site location: inferred from neighbouring sites |
| --- | --- |
| Least-squares matrix: full | H-atom parameters constrained |
| *R*[*F*2 > 2s(*F*2)] = 0.234 | *w* = 1/[s2(*F*o2) + (0.4286*P*)2 + 34.920*P*]  where *P* = (*F*o2 + 2*F*c2)/3 |
| *wR*(*F*2) = 0.518 | (D/s)max = 0.082 |
| *S* = 1.08 | Dρmax = 2.57 e Å-3 |
| 30090 reflections | Dρmin = -1.64 e Å-3 |
| 2846 parameters | Extinction correction: *SHELXL2018*/3 (Sheldrick 2018), Fc*=kFc[1+0.001xFc2l3/sin(2q)]-1/4 |
| 6345 restraints | Extinction coefficient: 0.104 (7) |
| Primary atom site location: iterative | Absolute structure: Flack x determined using 9615 quotients [(I+)-(I-)]/[(I+)+(I-)] (Parsons, Flack and Wagner, Acta Cryst. B69 (2013) 249-259). |
| Secondary atom site location: difference Fourier map | Absolute structure parameter: 0.42 (11); not reliably determined. |


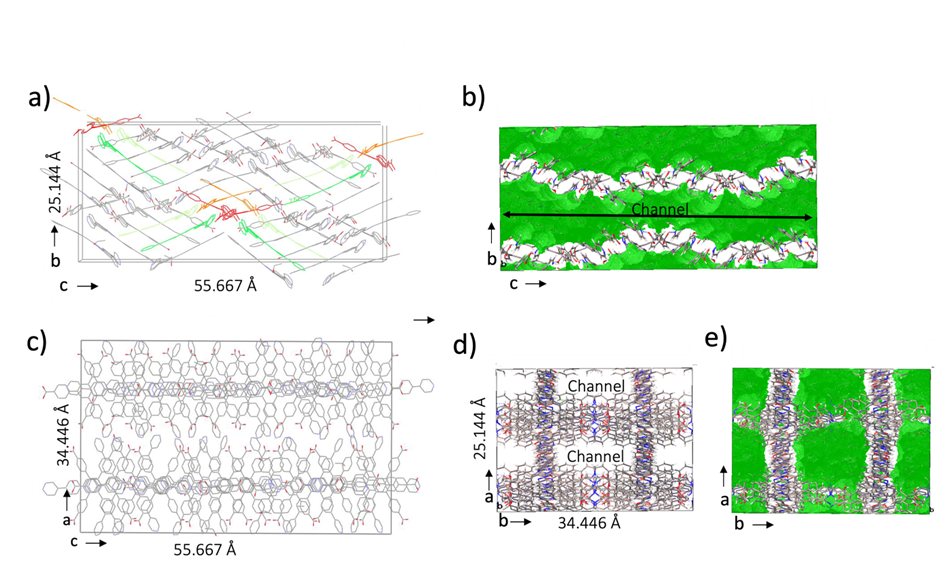


**Figure S2.** Overview of the crystal packing of **Hybrid-1** in the unit cell obtained after crystallisation in a toluene mixture: a) view onto bc plane showing interlocked **HOF-3COOH:TPY** where green represent **HOF-3COOH**, red represent **TPY**, b) view onto ac plane showing the continuous solvent accessible channel that runs through the crystal lattice, as a green contoured surface, c) view onto ac plane showing interlocked **HOF-3COOH:TPY,** d) view onto ab plane, atom colours grey:carbon, red:oxygen, blue:nitrogen, showing the continuous solvent channel, e) view onto ab plane showing solvent accessible channel as a green contoured surface.

**Table S2.** Crystallographic data and structure refinement results of **Hybrid-1** crystallized in toluene/ethanol mixture.

*-Crystal data*

| (C36H24N6·(C27H18O6)) | *F*(000) = 13944 |
| --- | --- |
| *Mr* = 979.04 | *D*x = 1.015 Mg m-3 |
| Monoclinic, *I* 2 | Cu *K*a radiation, l = 1.54178 Å |
| *a* = 34.446 (3) Å | Cell parameters from 21550 reflections |
| *b* = 25.144 (3) Å | Min D 0.95 max D 9.96 |
| *c* = 55.667 (6) Å | m = 0.515 mm-1 |
| b = 90.07 (5)° | *T* = 100(10) K |
| *V* = 48213.15 (83) Å3 | Block, colourless |
| *Z’* = 4 and Z = 28 | 0.13 × 0.08 × 0.05 mm3 |

*Experimental details*

| Crystal data | |
| --- | --- |
| Chemical formula | (C36H24N6·(C26H18O6)) |
| *M*r | 979.044 |
| Crystal system, space group | Monoclinic, *I* 2 |
| Temperature (K) | 100 |
| *a*, *b*, *c* (Å) | 34.446 (3), 25.144 (3), 55.667 (6) |
| b (°) | 90.07 (3) |
| *V* (Å3) | 48213.15 (83) |
| *Z’, Z* | 4, 28 |
| Radiation type | Cu *K*a |
| m (mm-1) | 1.40 |
| Crystal size (mm3) | 0.13 × 0.08 × 0.05 |
|  | |
| Data collection | |
| Diffractometer | Diffractometer: Rigaku 007HF equipped with Arc)Sec VHF Varimax confocal mirrors and a UG2 goniometer and HyPix 6000HE detector |
| Absorption correction | CrysAlisPro 1.171.42.60a (Rigaku Oxford Diffraction, 2022) Empirical absorption correction using spherical harmonics, implemented in SCALE3 ABSPACK scaling algorithm. |
| *T*min, *T*max | 0.524, 1.000 |
| No. of measured, independent and observed [*I* > 4s(*I*)] reflections | 179524, 30203, 22114 |
| *R*int | 0.073 |
| (sin q/l)max (Å-1) | 0.602 |
|  | |
| Refinement | |
| *R*[*F*2 > 2s(*F*2)], *wR*(*F*2), | 0.207, 0.230, 0.533, |
| No. of reflections (all) | 30203 |
| No. of parameters | 4749 |
| H-atom treatment | H-atom parameters constrained |
|  | *w* = 1/[s2(*F*o2) + (0.2046*P*)2 + 13.190*P*]  where *P* = (*F*o2 + 2*F*c2)/3 |
| Dñmax, Dñmin (e Å-3) | 0.8, -0.5 |


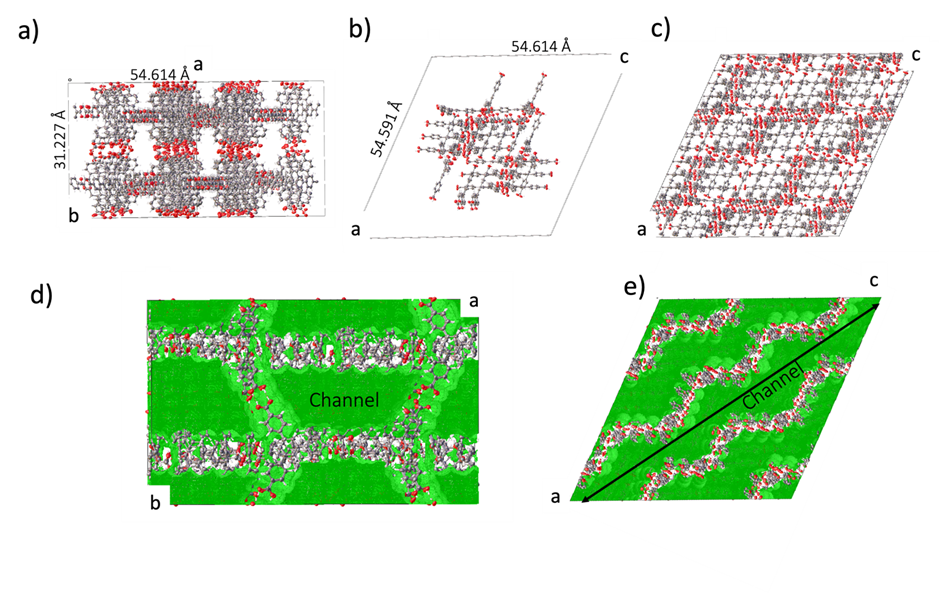
 **Figure S3.** Overview of the crystal packing of **HOF-3COOH** in the unit cell obtained after crystallisation in a methanol solution: a) view onto *ab* plane, atom colours grey:carbon, red:oxygen, white:hydrogen, revealing the open channels in the unit cell, b) view onto ac plane showing contents of the ASU and the twenty-eight independent interlocked 3COOH molecules, c) view onto ac plane revealing the herringbone arrangement of the packed molecules within the unit cell, d) view onto *ab* plane showing solvent accessible channel as a green contoured surface, e) view onto ac plane showing the continuous solvent accessible channel that runs through the crystal lattice, as a green contoured surface.

**Table S3.** Crystallographic data and structure refinement results of **HOF-3COOH** crystallized in methanol mixture.

*1-Crystal data*

| (C27H18O6) | *F*(000) = 25605.5 |
| --- | --- |
| *Mr* = 438.428 | *D*x = 0.962 Mg m-3 |
| Monoclinic, *C*c | Cu *K*a radiation, l = 1.54178 Å |
| *a* = 54.615 (3) Å | Cell parameters from 1160087 reflections |
| *b* = 31.227 (11) Å | 2 = 3.34–153.96° |
| *c* = 54.591 (3) Å | m = 0.564 mm-1 |
| b = 114.604 (6)° | *T* = 100 K |
| *V* = 84656.9 (8) Å3 | Block, colourless |
| *Z’* = 4 and Z = 112 | 0.45 × 0.34 × 0.25 mm3 |

*Experimental details*

| Crystal data | |
| --- | --- |
| Chemical formula | (C27H18O6) |
| *M*r | 438.428 |
| Crystal system, space group | Monoclinic, *C*c |
| Temperature (K) | 100 |
| *a*, *b*, *c* (Å) | 54.615 (3), 31.227 (11), 54.591 (3) |
| b (°) | 114.604 (6) |
| *V* (Å3) | 84656.9 (8) |
| *Z’, Z* | 4, 112 |
| Radiation type | Cu *K*a |
| m (mm-1) | 0.564 |
| Crystal size (mm3) | 0.45 × 0.34 × 0.25 |
|  | |
| Data collection | |
| Diffractometer | Diffractometer: Rigaku 007HF equipped with Arc)Sec VHF Varimax confocal mirrors and a UG2 goniometer and HyPix 6000HE detector |
| Absorption correction | CrysAlisPro 1.171.42.79a (Rigaku Oxford Diffraction, 2022) Empirical absorption correction using spherical harmonics, implemented in SCALE3 ABSPACK scaling algorithm. |
| *T*min, *T*max | 0.539, 1.000 |
| No. of measured, and independent observed [*I* > 2s(*I*)] reflections | 1160087, 161203 |
| *R*int | 11.72 |
| *I/* s(I) | 18.6 |
| (sin q/l)max (Å-1) | 0.79 |
|  | |
| Refinement | |
| *R*[*F*2 > 2s(*F*2)], *wR*(*F*2), *R*[*F*2 > all data *F*2)] | 0.222, 0.5557, 0.2335 |
| No. of reflections | 161203 |
| No. of parameters | 8357 |
| No. of restraints | 3418 |
| H-atom treatment | H-atom parameters constrained riding model |
|  | *w* = 1/[s2(*F*o2) + (0.2*P*)2]  where *P* = (*F*o2 + 2*F*c2)/3 |
| Dñmax, Dñmin (e Å-3) | 2.07, -1.18 |


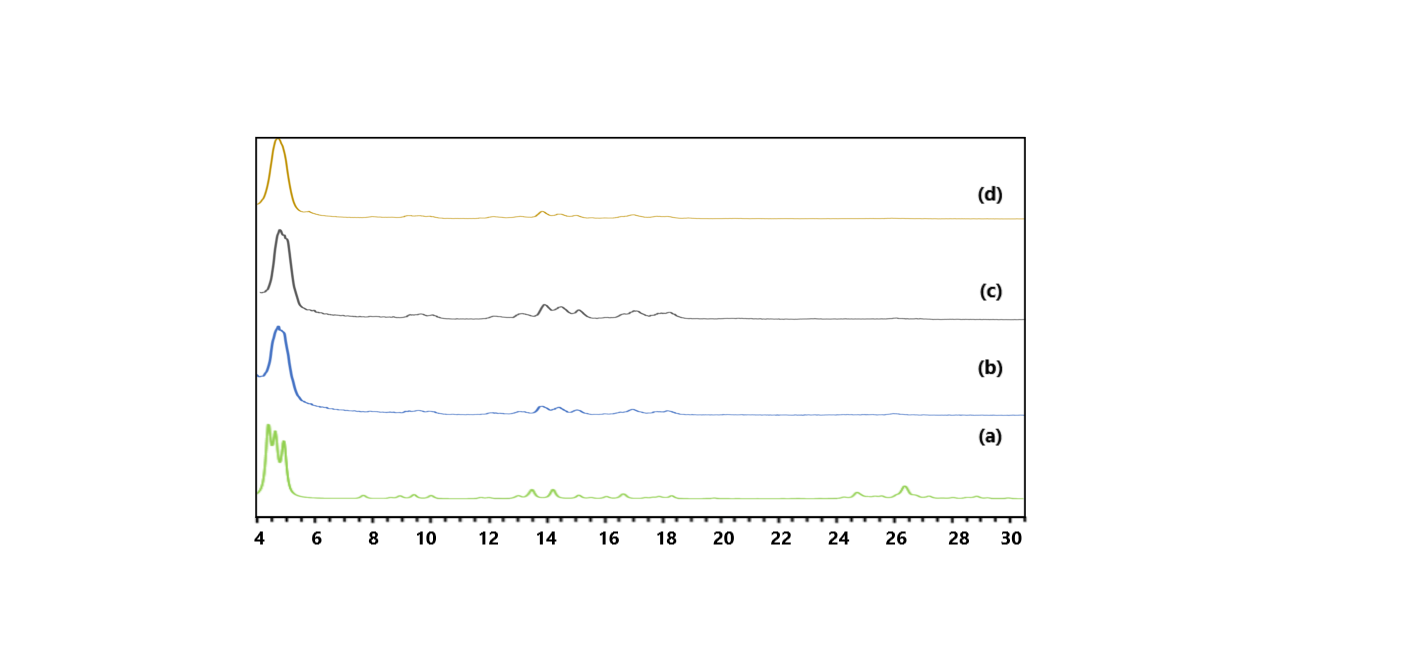


**Figure S4.** PXRD patterns for: (a) simulated data from crystal [1], (b) as-synthesized **FA-TPY**, (c) as-synthesized **DFA-TPY** and (d) **DFA-TPY** after activation.

**Figure S5.** TGA curve under N2 for the as-synthesized sample **DFA-TPY**


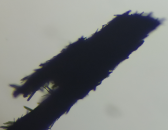

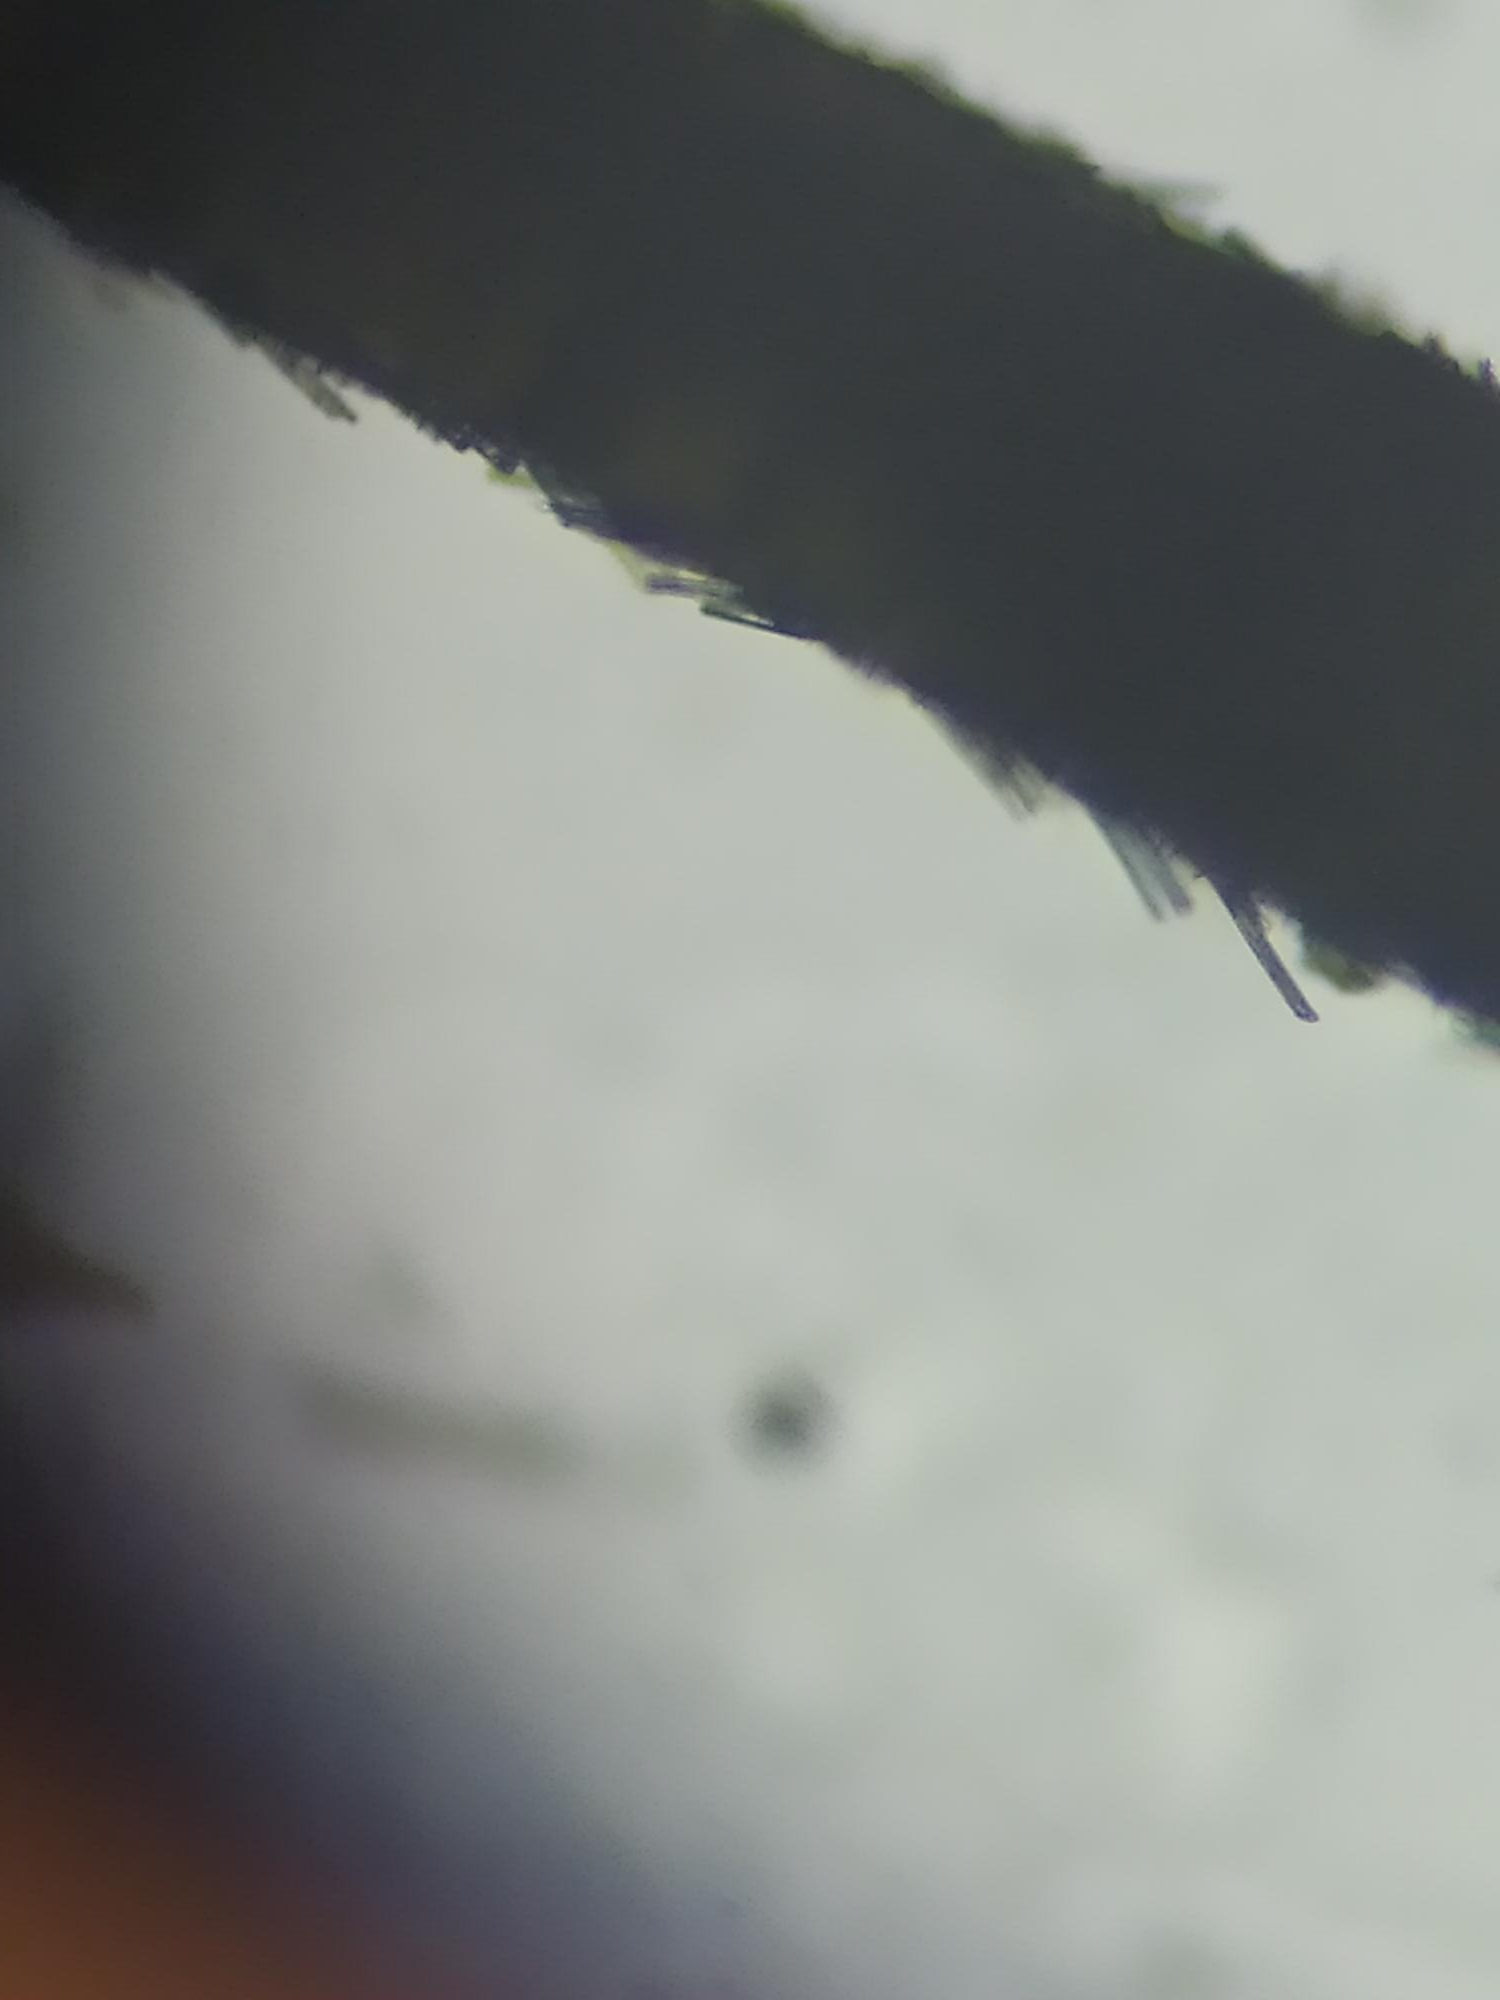


**Figure S6.** Optical microscopy images of **P2-TPY@P2-TPY** with seed crystals of millimetre size having a secondary generation of crystals of micrometre scale. Scale bars: 200 microns


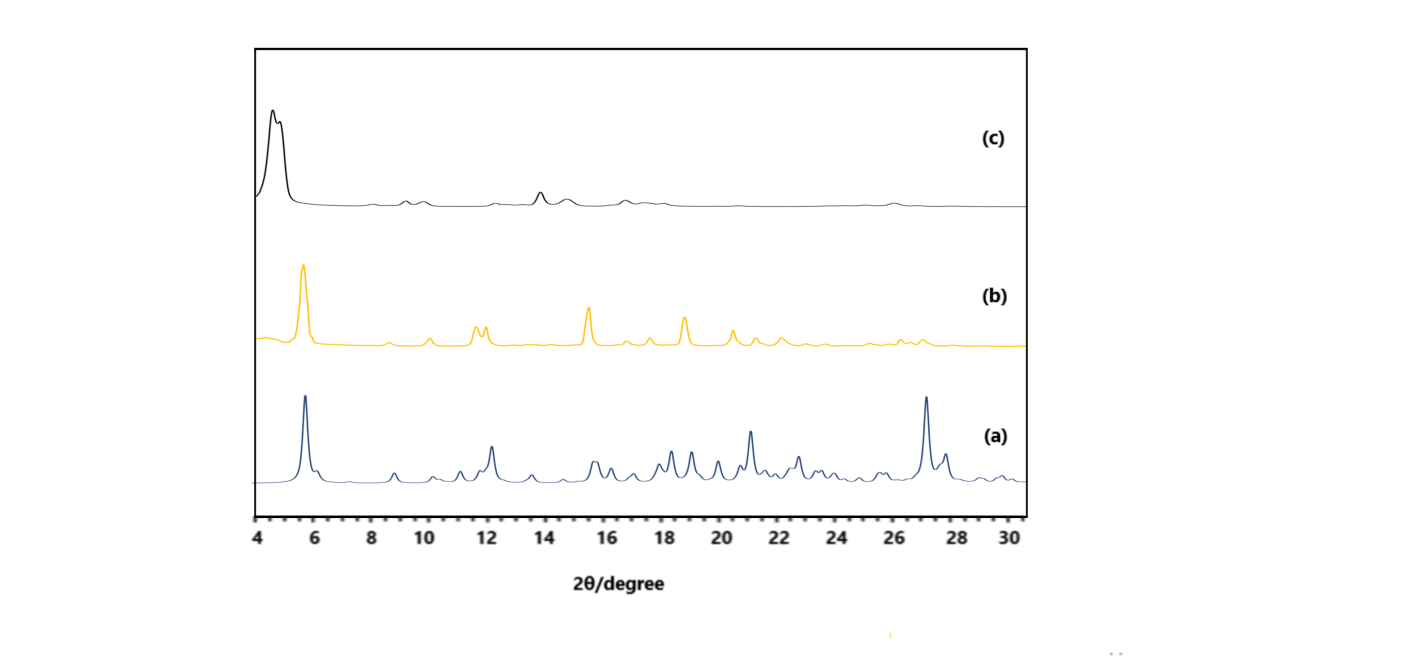


**Figure S7.** PXRD patterns for: a) simulated from crystal data for **P2-TPY**, b) as-synthesized **P2-TPY**, and c) single crystal-to-single crystal transformation for **P2-TPY@P2-TPY** during activation.


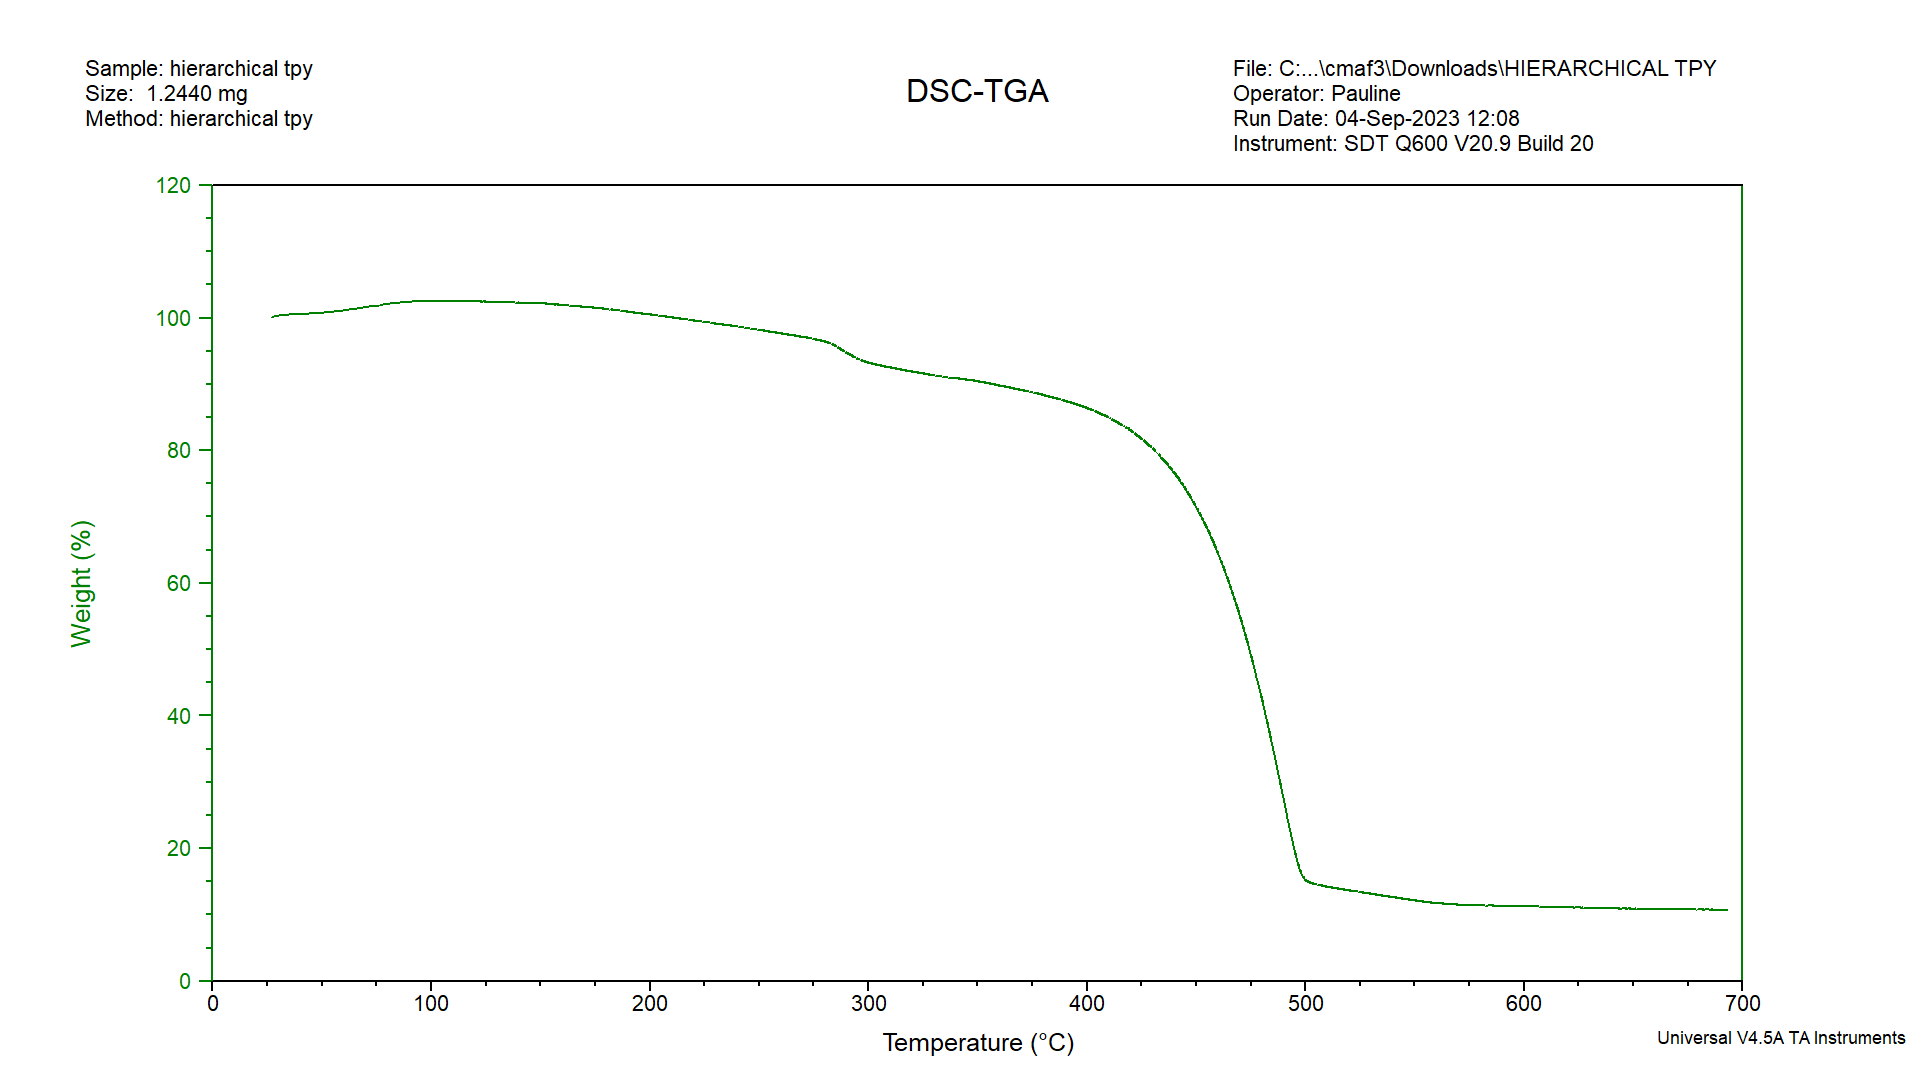


**Figure S8.** TGA curve under N2 for the as-synthesized sample **P2-TPY@P2-TPY**

1. b)


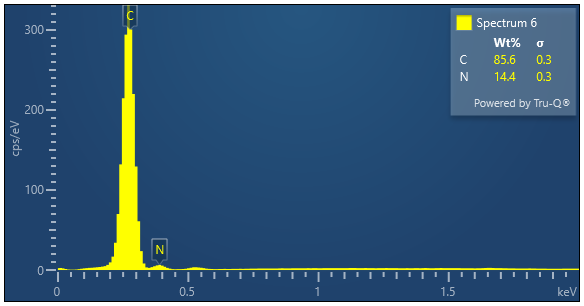

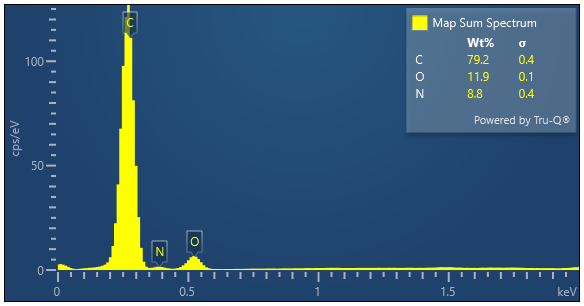


**Figure S9.** EDX analysis of the evolution C,N and O for during the growth of **Hybrid-1** on **P2-TPY** to obtain **P2-TPY@Hybrid-1.**

**
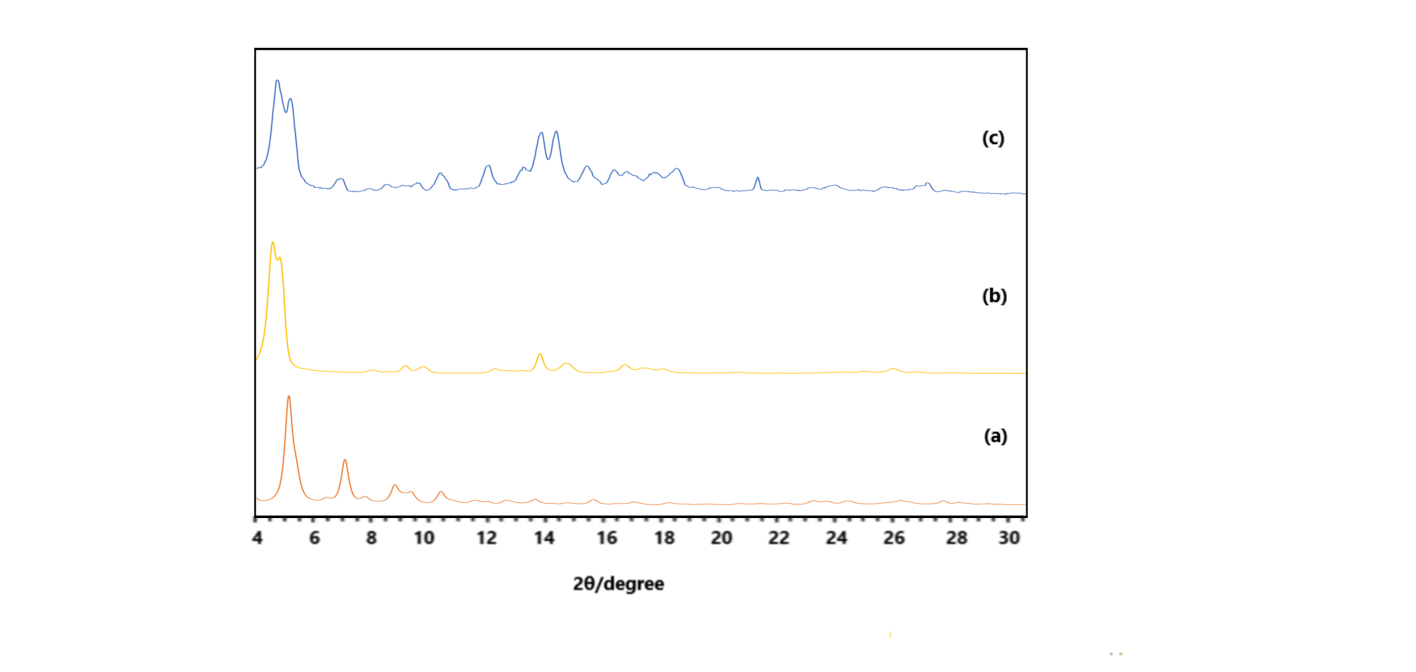
**

**Figure S10.** PXRD patterns for: a) **Hybrid-1** simulated b) activated **P2-TPY** and c) **P2-TPY@Hybrid-1**

**
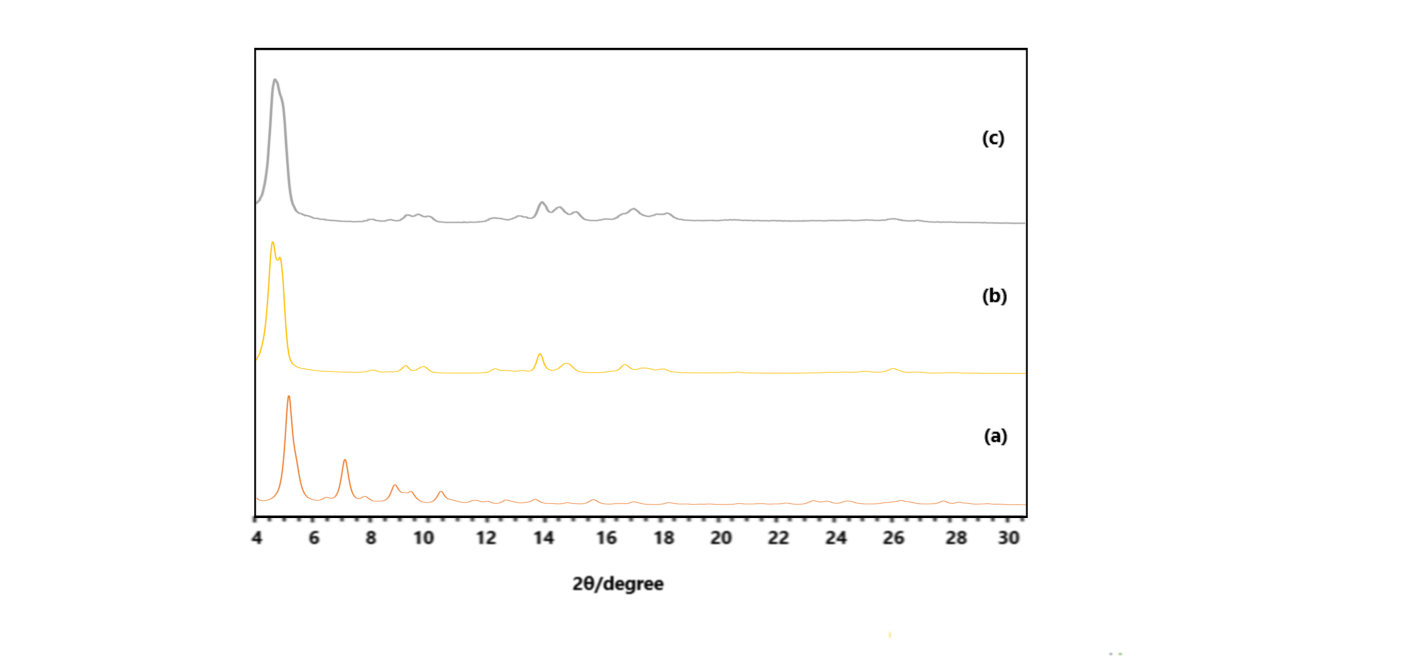
**

**Figure S11.** PXRD patterns for: a) **Hybrid-1** simulated b) activated **P2-TPY** and c) activated **P2-TPY@Hybrid-1**

**Figure S12.** UV-Vis absorbance of the ethanol solution where the **P2-TPY** crystals were submerged for 3 weeks.


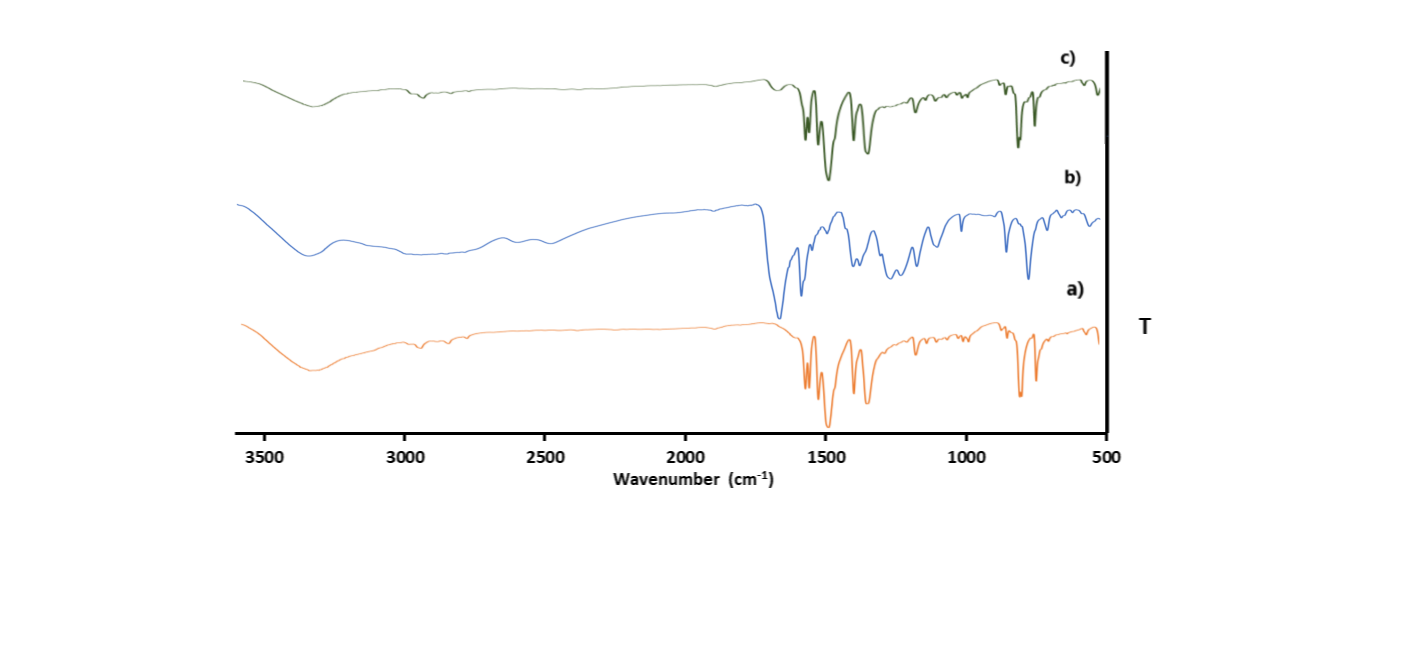


**Figure S13.** FT-IR spectra of a) **P2-TPY**,b) **3COOH** andc) **P2-TPY@Hybrid-1**.


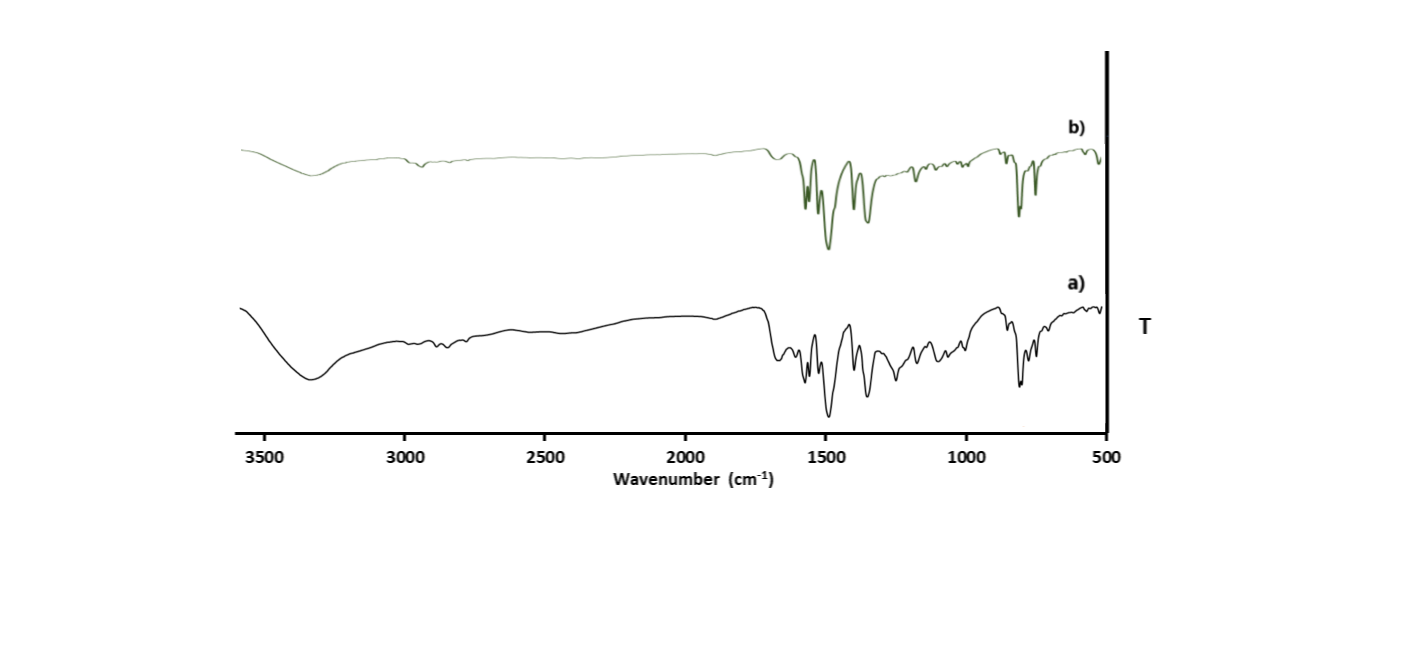


**Figure S14.** FT-IR spectra of a) **Hybrid-1** andb) **P2-TPY@Hybrid-1**.

**-Density functional theory (DFT) calculations**

All the calculations were done using **ORCA** version 5.0.3 [4]. The structures of the single molecules and their dimers with various functionals were optimised using initial coordinates in the cif files. This optimises the geometry and calculates the formation energy of the molecule that was used in later calculations.  We accounted for the basis set superposition error (BSSE) by following the procedure as given within the ORCA documentation. The BSSE was small accounting for approximately 5% of the interaction energy.

Pi Stacked interaction energy = -27.23073022 kcal/mol

H Bond interaction energy = -11.9443 kcal/mol

See below for some images and the calculation values.

Note: Orca reports energies in Hartrees (Eh)

1 Hartree = 27.2114 Electron Volts

1 Hartree = 627.5 kcal/mol


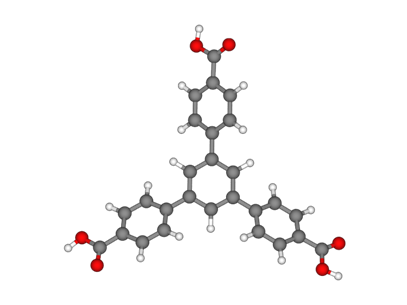

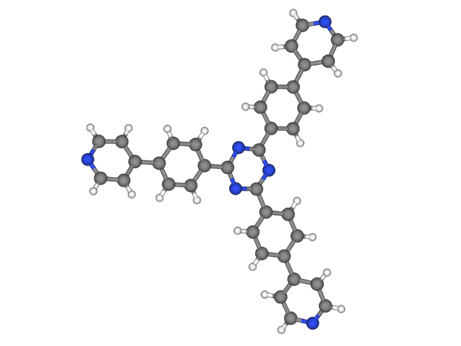


**Fig S15.** Representation of **3COOH** (left) and **TPY** (right)

**a)**


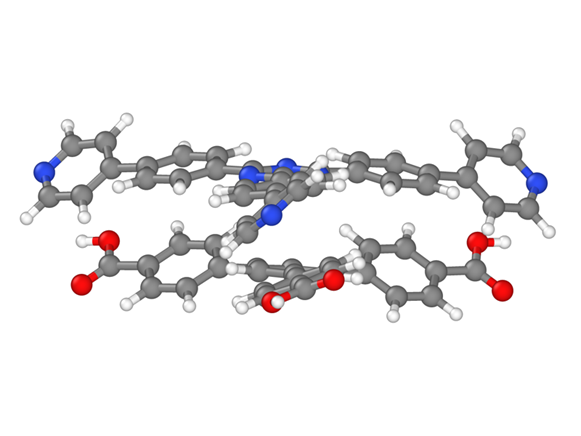

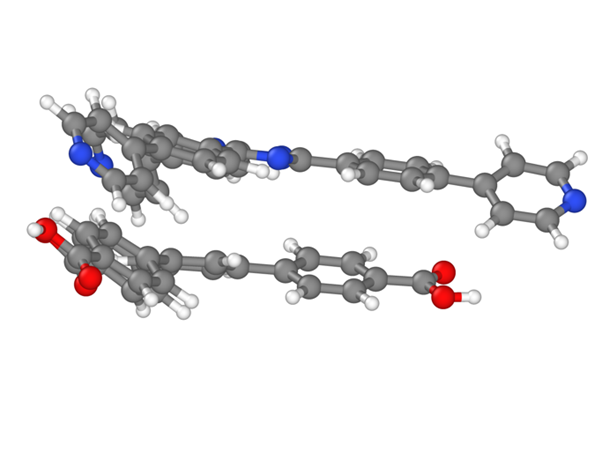


**b)**

**
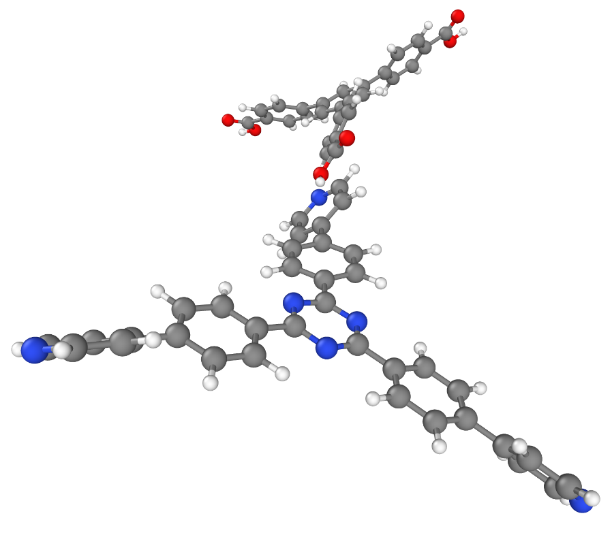

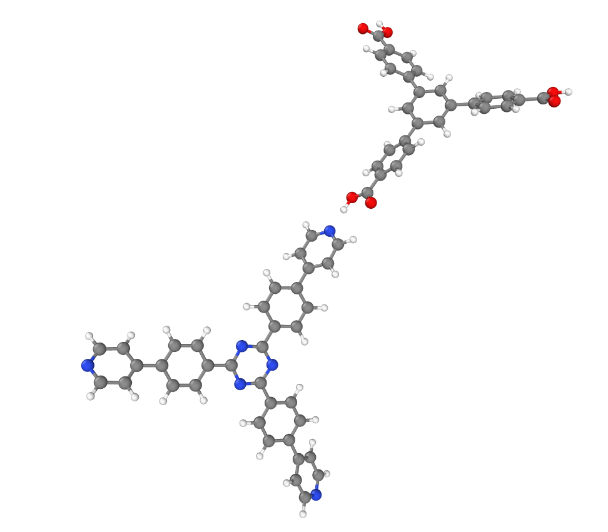
**

**Fig S16.** Representation of the stacked dimers in **Hybrid-1** used for the DFT calculations: a) views of the π stacked and b) H-bond interactions between dimers


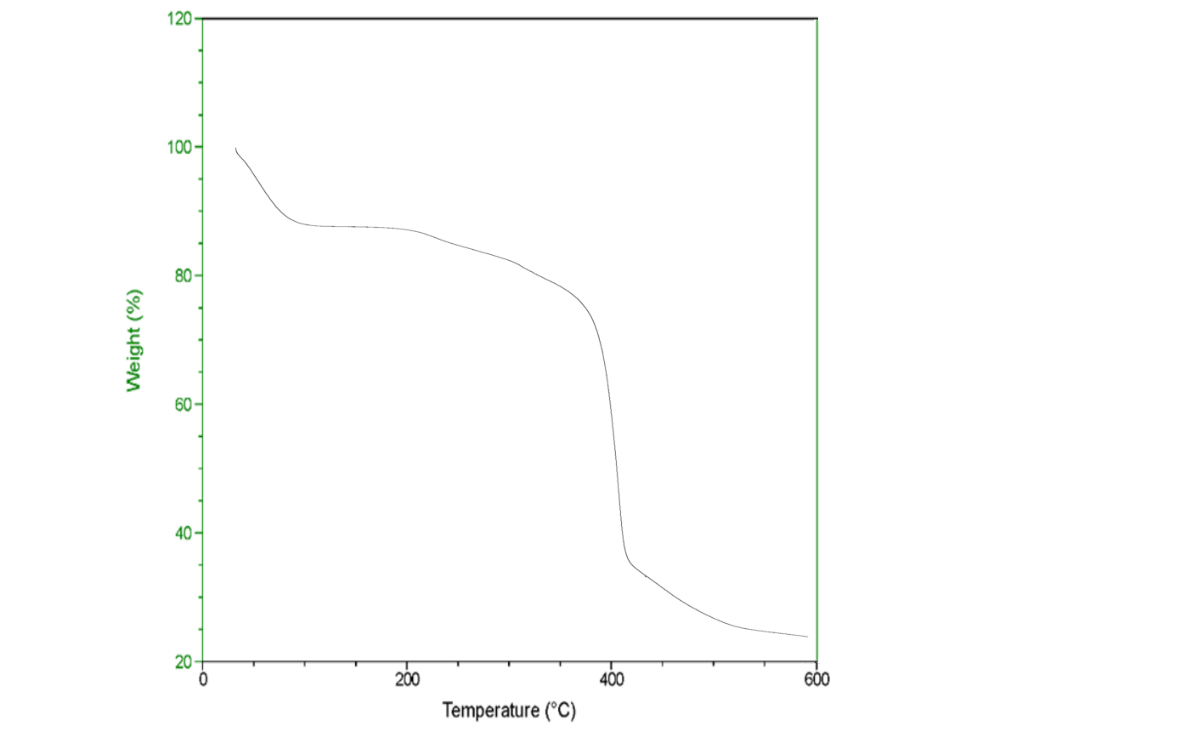


**Figure S17.**TGA curve under N2 for **P2-TPY@Hybrid-1**.

**
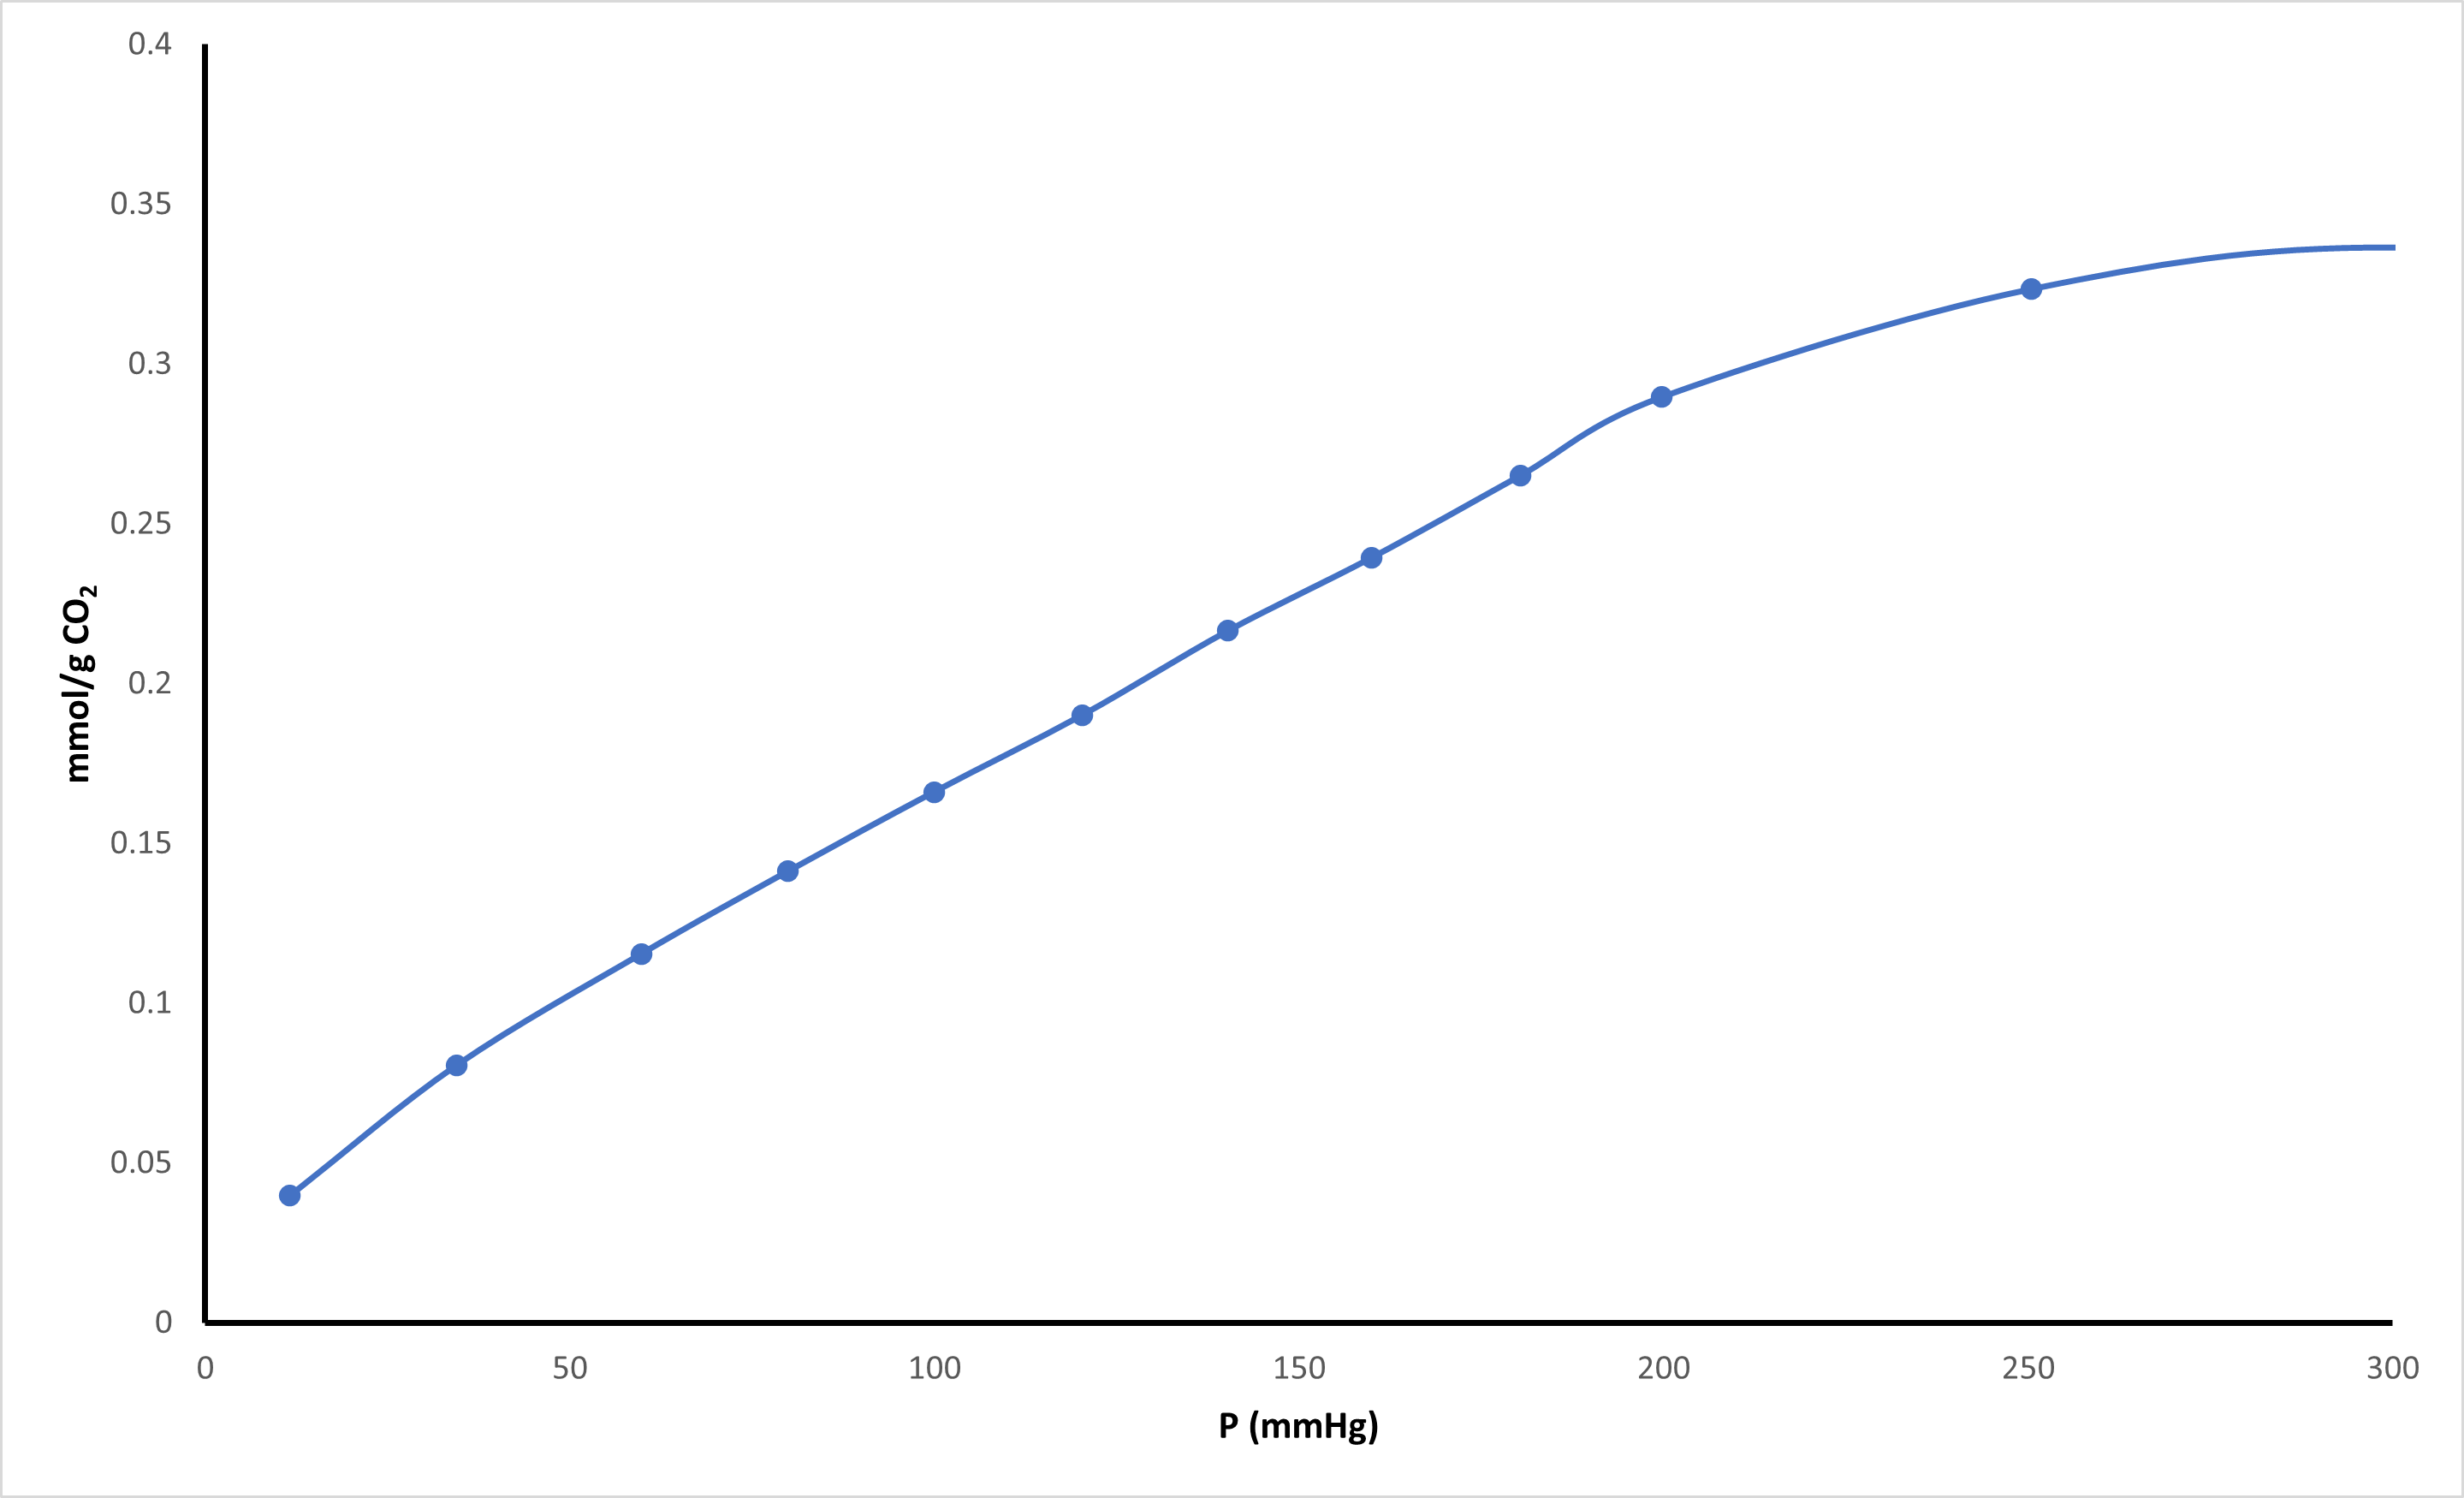
**

**Figure S18.** CO2 adsorption isotherm for **P2-TPY@Hybrid-1** at 223 K.

**Figure S19.** TGA curve under N2 for **HOF-3COOH**


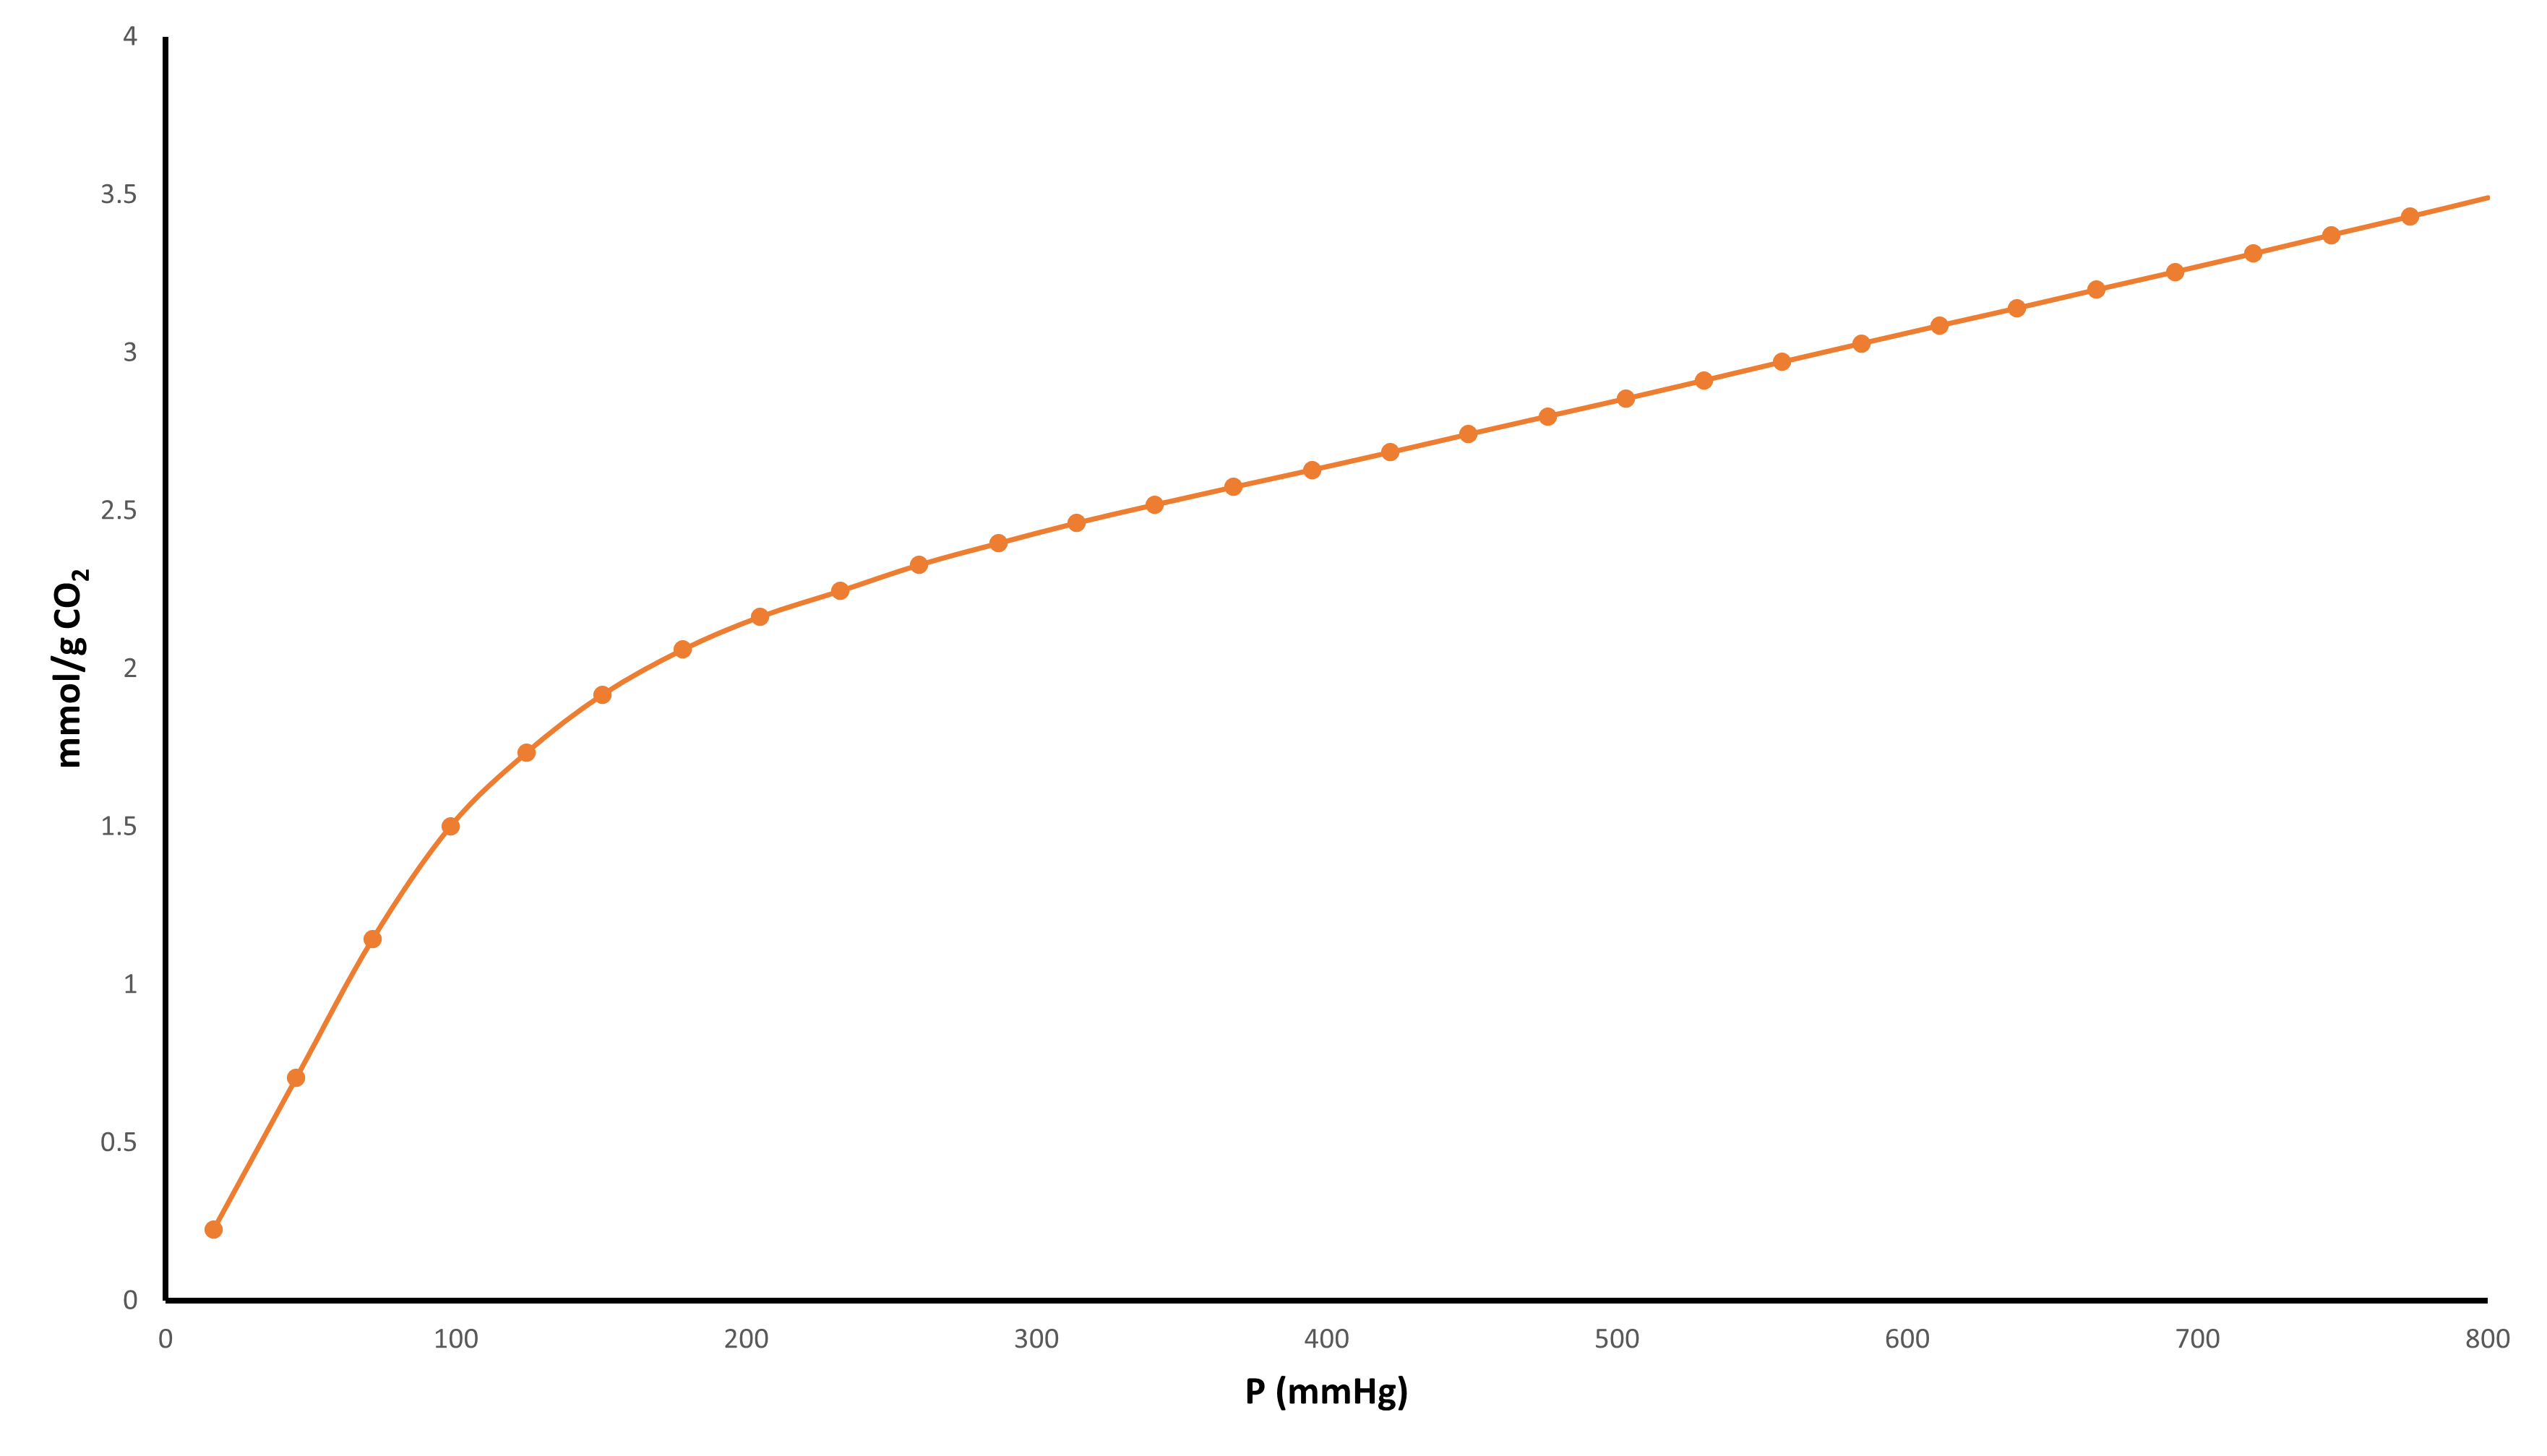


**Figure S20.** CO2 adsorption isotherm for **HOF-3COOH** at 223 K.

1. b)


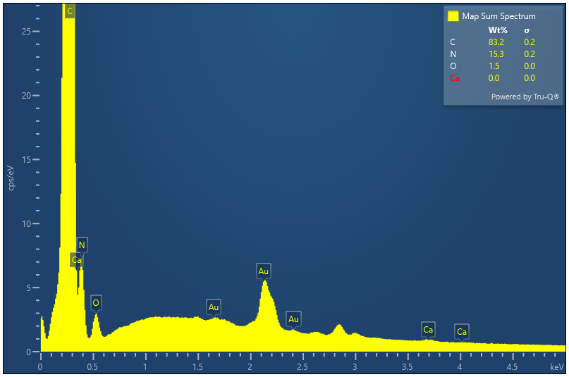

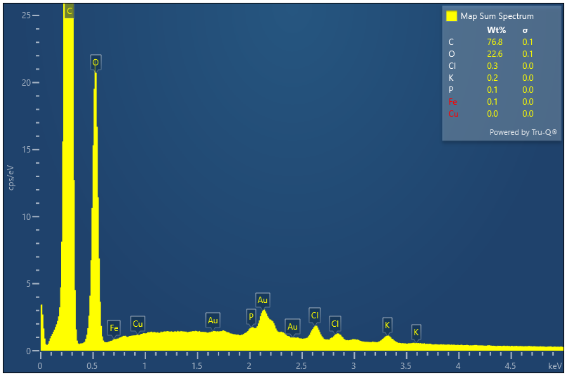


**Figure S21.** EDX analysis of C,N and Ofor (a) **HOF-3COOH** and (b) the shell of **HOF-3COOH@P2-TPY**


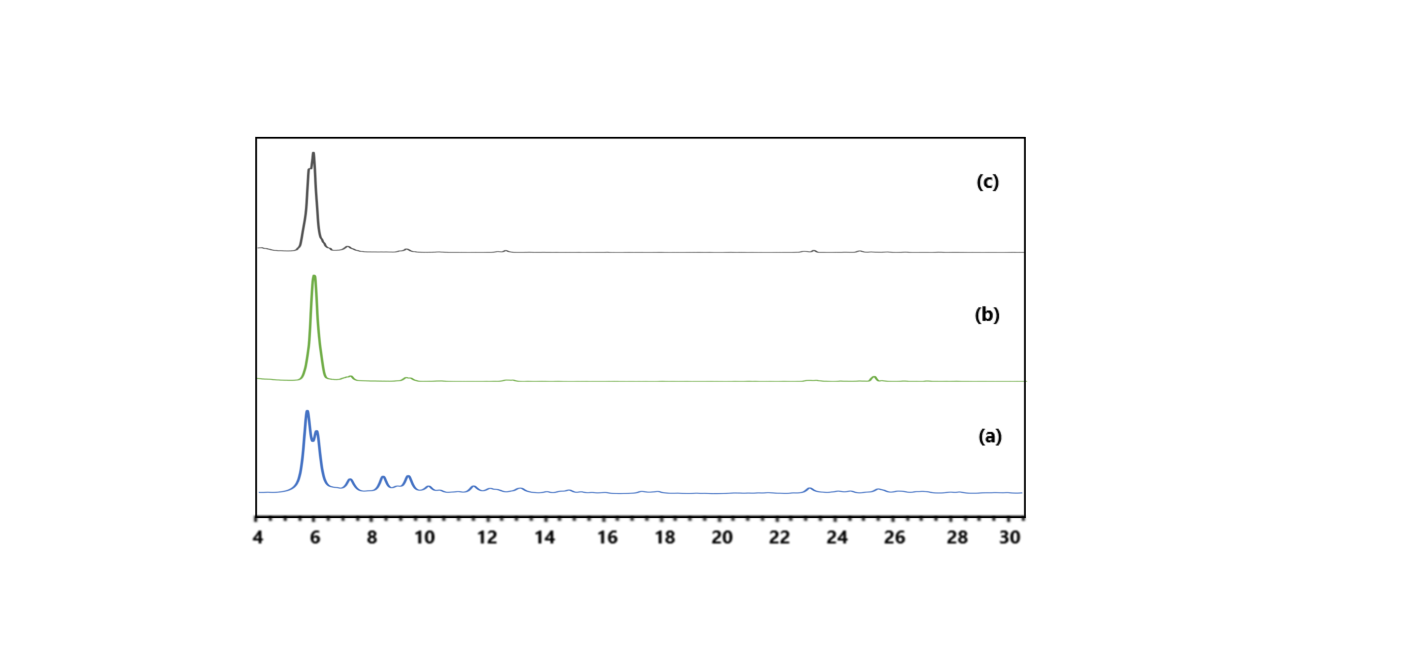


**Figure S22.** PXRD patterns for: a) simulated from crystal data **HOF-3COOH**, b) as-synthesized **HOF-3COOH** and c) activated **HOF-3COOH**.


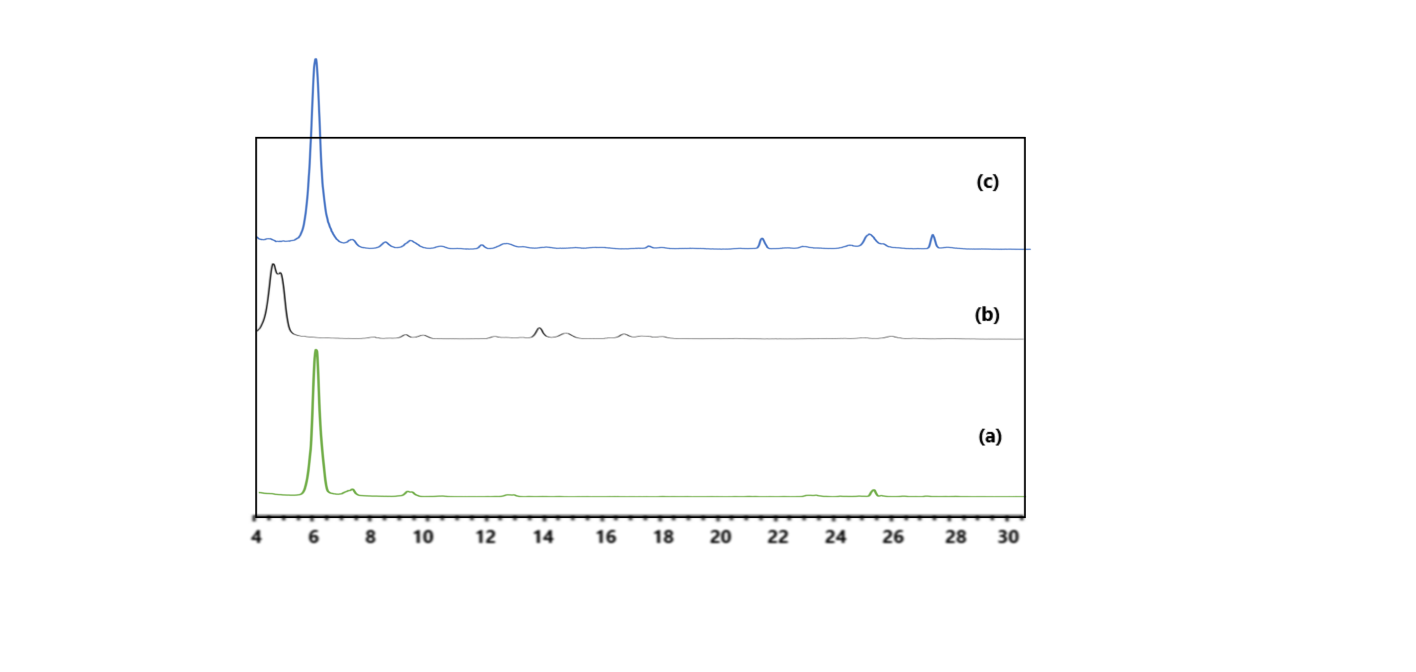


**Figure S23.** PXRD patterns for: a) as-synthesized **HOF-3COOH** b) activated **P2-TPY** andc) activated **HOF-3COOH@P2-TPY**.

**
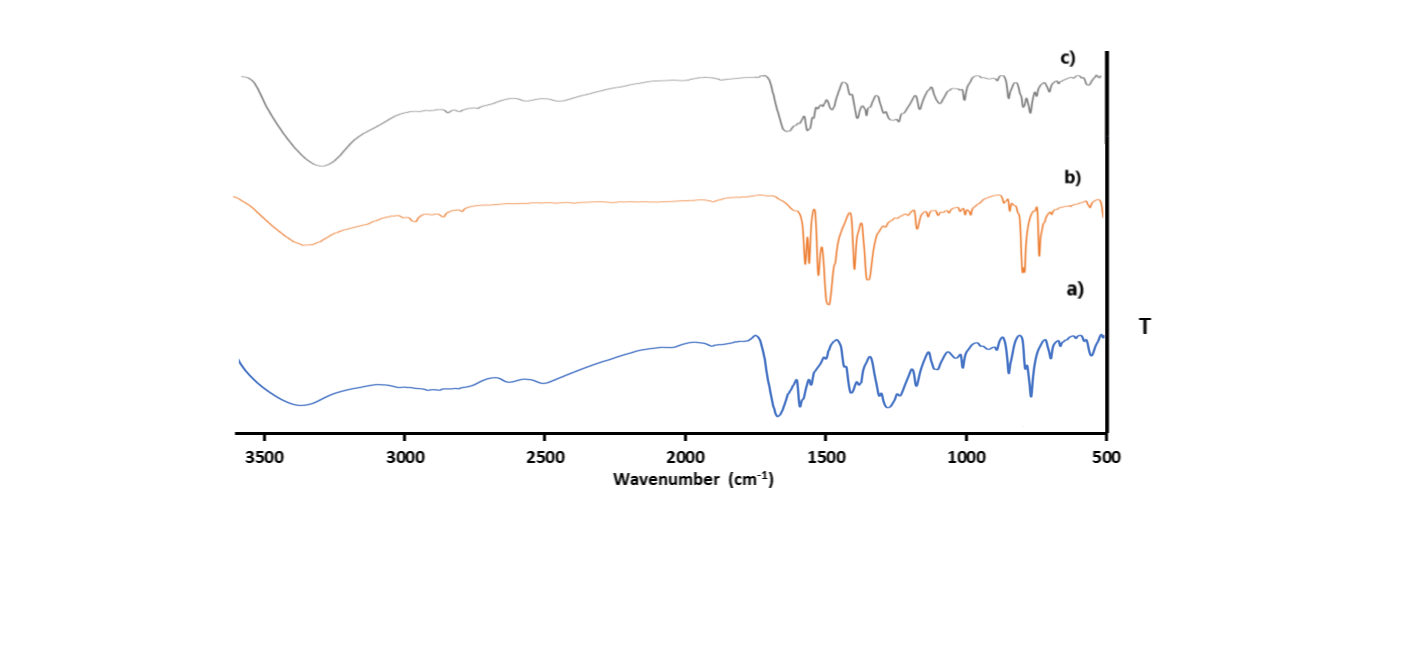
**

**Figure S24.** FT-IR spectra of a) **HOF-3COOH,** b) **P2-TPY** andc) **HOF-3COOH@P2-TPY**.

**Figure S25.** TGA curve under N2 for **HOF-3COOH@P2-TPY**.


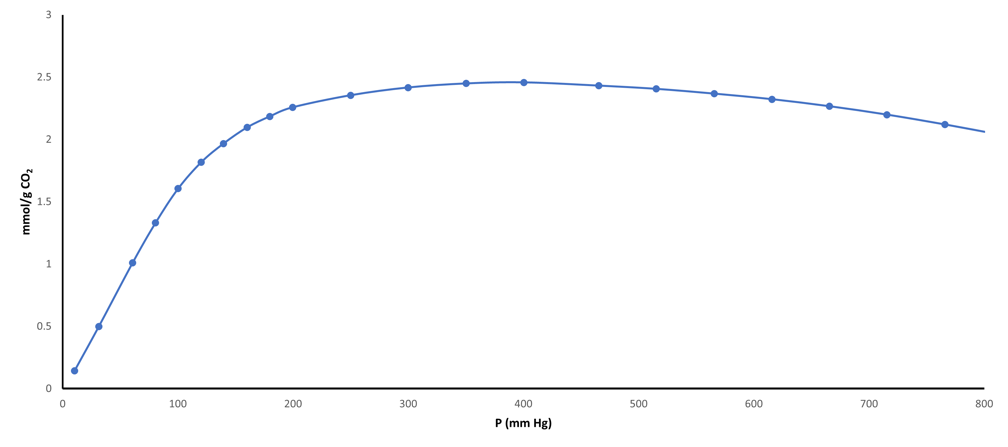


**Figure S26.** CO2 adsorption isotherm for **HOF-3COOH@P2-TPY** at 223 K.


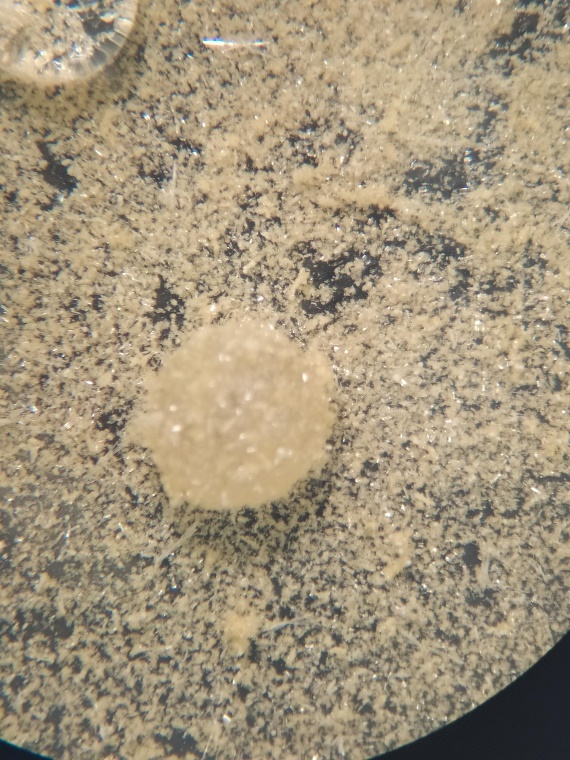
**a)**


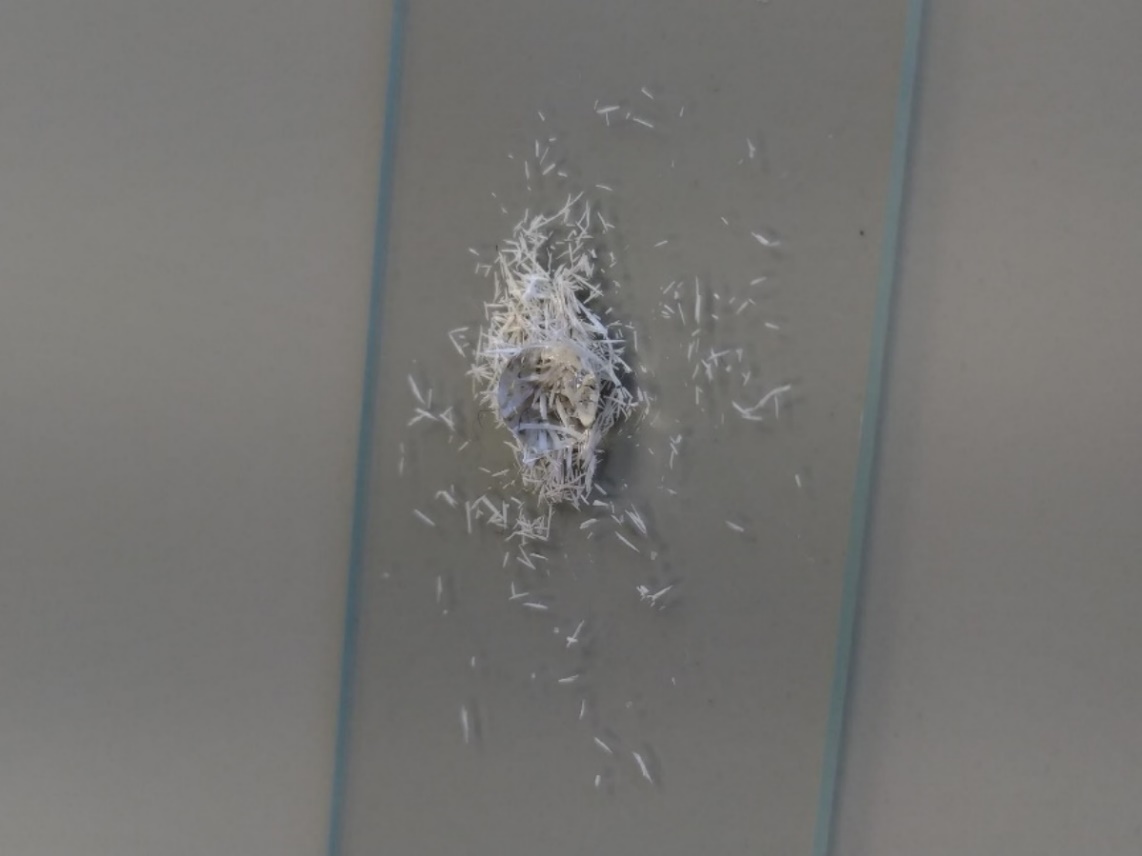

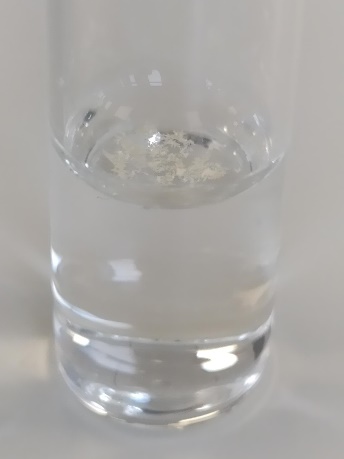


**b)**


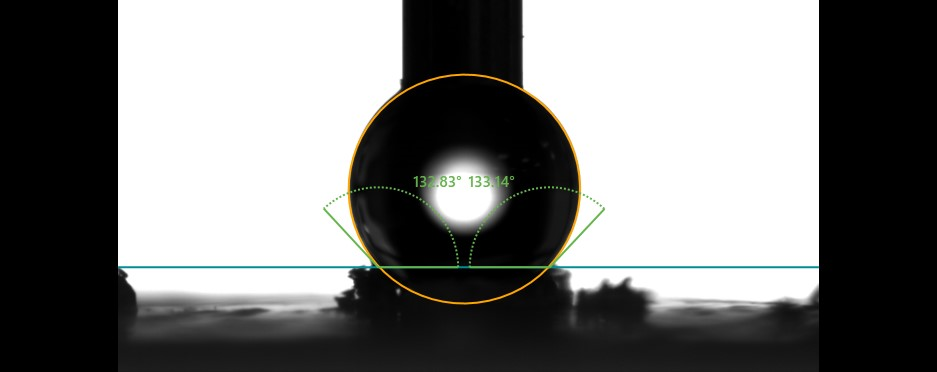


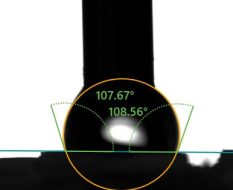


**Figure S27** a)Examples of the low wettability in presence of water for **DFA-TPY** (left), **P2-TPY@P2-TPY** (centre) and **P2-TPY@Hybrid-1** (right). b) Contact angle measurements for **P2-TPY** (left) and **P2-TPY@Hybrid-1** (right).

**References:**

1- C. A. Halliwell, S. E. Dann, J. Ferrando-Soria, *et al*. Angew. Chem. Int. Ed., **61**, e202208677 (2022).

2- CrysAlisPRO, Oxford Diffraction /Agilent Technologies UK Ltd, Yarnton, England.

3- L. J. Bourhis, O. V.Dolomanov, R. J. Gildea, *et al*. Acta Cryst. **A71**, 59-75, (2015).

4-F. Neese, WIREs Comput. Mol. Sci. 12:e1606, (2022).
